# Supplementary material for: A low-cost mobile multidisciplinary measurement platform for monitoringgeophysical parameters
Source: Copernicus journal article supplement (doi:10.5194/amt-2020-371), 2020-12-02
Supplement: Supplementary file [file amt-2020-371-AC2-supplement.pdf]

# The INFRA-EAR: a low-cost mobile multidisciplinary measurement platform for monitoring geophysical parameters

---

1 Olivier F.C. den Ouden<sup>1,2</sup>, Jelle D. Assink<sup>1</sup>, Cornelis D. Oudshoorn<sup>3</sup> Dominique Filippi<sup>4</sup> and Láslo G. Evers<sup>1,2</sup>

2  
3 <sup>1</sup>R&D Department of Seismology and Acoustics, Royal Netherlands Meteorological Institute, De Bilt, The Netherlands

4 <sup>2</sup>Dept. of Geoscience and Engineering, Delft University of Technology, Delft, The Netherlands

5 <sup>3</sup>R&D Department of Observations and Data Technology, Royal Netherlands Meteorological Institute, De Bilt, The Netherlands

6 <sup>4</sup>Sextant Technology Inc., Marton, New-Zealand

## 8 Abstract

9 Geophysical studies and real-time monitoring of natural hazards, such as volcanic eruptions or severe  
10 weather events, benefit from the joint analysis of multiple geophysical parameters. However, typical  
11 geophysical measurement platforms still provide logging solutions for a single parameter, due to different  
12 community standards and the higher cost rate per added sensor.

13 In this work, the ~~'infrasound logger'~~ 'Infrasound and Environmental Atmospheric data Recorder'  
14 (INFRA-EAR) is presented, which has been designed as a low-cost mobile multidisciplinary measurement  
15 platform for geophysical monitoring. The platform monitors in particular infrasound, but concurrently  
16 measures barometric pressure, accelerations, wind flow and uses the Global Positioning System (GPS)  
17 ~~for positioning of to position~~ the platform. Due to its digital design, the sensor platform can readily be  
18 integrated with existing geophysical data infrastructures and be embedded in ~~the analysis of geophysical~~  
19 ~~data-geophysical data analysis~~. The small dimensions and ~~lower-low~~ cost price per unit allow for uncon-  
20 ventional, experimental designs, for example ~~high-density-~~ high-density spatial sampling or deployment  
21 on moving measurement platforms. Moreover, such deployments can complement existing high-fidelity  
22 geophysical sensor networks. The platform is designed using digital Micro-electromechanical Systems  
23 (MEMS) sensors ~~that are~~ embedded on a Printed Circuit Board (PCB). The MEMS sensors on the PCB  
24 are ~~÷~~a GPS, a three-component accelerometer, a barometric pressure sensor, an anemometer and a dif-  
25 ferential pressure sensor. A programmable microcontroller unit controls the sampling frequency of the  
26 sensors ~~;~~ ~~and the~~ and data storage. A waterproof casing is used to protect the mobile platform against  
27 the weather. The casing is created with a stereolithography (SLA) Formlabs 3D printer, using durable  
28 resin.

29 Thanks to ~~a~~ low power consumption (9 Wh over 25 days), the system can be powered by a battery or  
30 solar panel. Besides the description of the platform design, we discuss the calibration and performance  
31 of the individual sensors.

---

# 1 Introduction

Real-time monitoring of natural hazards, such as volcanic eruptions or severe weather events benefit from the joint analysis of multiple geophysical parameters. However, geophysical measurement platforms are typically designed for the measurement of to measure a single parameter, due to different community standards and the higher cost rate per added sensor. The quality and robustness of geophysical measuring equipment generally scales scale with price, due to higher material costs and research and development (R&D) expenses of the manufacturer. In addition, the deployment of such equipment comes with complex deployment and calibration procedures, and requires the presence of a robust power and data infrastructure.

Geophysical institutes often place multiple sensor platforms co-located. Meteorological institutes, for example, measure various meteorological parameters for comparison, which improves the weather observations, as well as weather and weather, forecast models. The Comprehensive Nuclear-Test-Ban Treaty Organization (CTBTO) performs various geophysical measurements at its measurement sites where possible. The International Monitoring System (IMS), which is in place for the verification of the CTBT, performs continuous seismic, hydroacoustic, infrasonic and radionuclide measurements [Marty, 2019]. In addition, the IMS infrasound arrays and radionuclide facilities host auxiliary meteorological equipment, as this data facilitates the review of the primary IMS data streams. Besides its use for verifying the CTBT, it has also been shown that a multi-instrumental observation observational network such as the IMS can provide useful information on the vertical dynamic structure of the middle and upper atmosphere, in particular when paired with complementary upper atmospheric remote sensing techniques such as lidar [Blanc et al., 2018]. Other studies that involve the analysis of multiple geophysical parameters include seismo-acoustic analyses of explosions ([Assink et al., 2018] [Averbuch et al., 2020] [Assink et al., 2018, Averbuch et al., 2020]), earthquakes ([Shani-Kadmiel et al., 2018]), and volcanoes ([Green et al., 2012]).

National Weather Services, such as the Royal Netherlands Meteorological Institute (KNMI), have expressed an interest in measuring weather on a local scale to inform citizens and warn in case of extreme weather. In addition, such measurements allow for higher-resolution measurements of sub-grid scale atmospheric dynamics, which will contribute to the improvement of short-term and now-casting weather forecasts [Manobianco and Short, 2001, Lam]. Therefore it became part of a low-cost citizen weather station program, to increase the spatial resolution of conventional numerical weather prediction models. In the Netherlands, over 300 of those weather stations are contributing contribute to a global citizen science project, Weather Observations Website (WOW) [Garcia-Marti et al., 2019] [Cornes et al., 2020] [Garcia-Marti et al., 2019, Cornes et al., 2020]. Nonetheless, due to the required infrastructure of the equipment, many platforms are spatially static. Having a low-cost multidisciplinary mobile sensor platform allows for high-resolution spatial sampling and complement existing high-fidelity geophysical sensor networks [Poler et al., 2020] (e.g., buoys in the open ocean [Grimmett et al., 2019], and stratospheric balloons [Poler et al., 2020]).

Various disciplines are applying apply new sensor technology to obtain higher spatial and temporal resolution [D’Alessandro et al., 2014] for geophysical hazard monitoring. Micro-electromechanical systems (MEMS) are small single-chip sensors that combine electrical and mechanical components and have a low energy consumption. The seismic community has created low-cost reliable MEMS accelerometers [Homeijer et al., 2011] [Milligan et al., 2011] [Zou et al., 2014] [Homeijer et al., 2011, Milligan et al., 2011, Zou et al., 2014] to detect strong accelerations that exceed values due to Earth’s gravity field [Speller and Yu, 2004] [Laine and Mougenot, 2007] [Homeijer et al., 2014] [Speller and Yu, 2004, Laine and Mougenot, 2007, Homeijer et al., 2014]. Moreover, the infrasound [Marcillo et al., 2012] [Anderson et al., 2018] [Marcillo et al., 2012, Anderson et al., 2018], as well as the meteorological community are integrating MEMS sensors into the existing sensor network [Huang et al., 2003] [Fang et al., 2010] [Ma et al., 2011] [Huang et al., 2003, Fang et al., 2010, Ma et al., 2011].

In this work, the ‘infrasound logger’ INFR-EAR is presented, which has been designed as a low-cost mobile multidisciplinary measurement platform for geophysical monitoring, in particular, infrasound. The platform uses various digital MEMS sensors, which are embedded on a Printed Circuit Board (PCB). A programmable microcontroller unit, as well embedded on the PCB, controls the sampling frequency of the sensors sensors’ sampling frequency and establishes the energy supply for the sensors as well as and the data-communication and storage. A waterproof casing protect protects the mobile platform against the weather. The casing is created with a stereo-lithography (SLA) Formlabs 3D printer, using durable resin. Because of it’s its low power consumption, the system can be powered by a battery or solar panel.

---

84 Previous studies have presented similar mobile infrasound sensor designs [Anderson et al., 2018, Marcillo et al., 2012, RBOOM  
85 , which have shown how low-cost, miniature sensors can complement existing measurement network (e.g.,  
86 volcanic and earthquake monitoring). Those platforms differ from the INFRA-EAR by dimensions, multidisciplinary  
87 purpose, and digital design. All sensors of the INFRA-EAR have an in-built ADC, which directly generates  
88 digital outputs. Therefore, the INFRA-EAR can be easily integrated into the existing hardware and software  
89 sensor infrastructure. Furthermore, the casing design and development is based on the latest technology of  
90 3D printing. Furthermore, the platform design and purpose are adaptive to various monitoring campaigns.

91 The ability to detect infrasonic signals of interest depends on the ~~strength of the signal~~ signal's strength relative  
92 to the noise levels at the receiver side, the signal to noise ratio (SNR). The signal strength depends on the  
93 transmission loss that a signal experiences propagating from source to receiver. Infrasound measurements  
94 ~~benefits~~ benefit from insights in the atmospheric noise levels (e.g., wind conditions), the meteorological  
95 conditions (e.g., barometric pressure, temperature, and humidity), as well as the movement and positioning  
96 of the sensors (e.g., accelerations) [Evers, 2008].

97 While there are clear benefits associated with a MEMS-based mobile platform (e.g., cheap and rapid deploy-  
98 ments to (temporarily) increase coverage), MEMS sensors are known to be less accurate than conventional  
99 high-fidelity equipment. Especially digital MEMS sensors, which have a ~~built-in~~ built-in Analog-Digital-  
100 Converter (ADC), are known for their high self-noise level. Nonetheless, they could be used near a geo-  
101 physical sources which generate high SNR signals. Several geophysical measurements [Marcillo et al., 2012]-  
102 [Grangeon and Lesage, 2019] [Laine and Mougénot, 2007] [D'Alessandro et al., 2014] [Marcillo et al., 2012, Grangeon and Le  
103 show the benefit of MEMS sensors, and how they complement the existing sensor network.

104 In this paper, the design and calibration of the 'infrasound logger' INFRA-EAR is discussed. Due to its  
105 digital design, the platform can readily be integrated ~~in into~~ existing geophysical sensor infrastructures. The  
106 remainder of this article is organized as follows. Section 2 introduces the mobile platform, its design and  
107 features. Section 3 describes the various ~~sensor that are~~ sensors embedded on the platform ~~as well as and~~  
108 the relative calibrations with high-fidelity reference equipment. Firstly, a novel miniature digital infrasound  
109 sensor is introduced, and its theoretical response is derived. Secondly, the barometric MEMS sensor is  
110 discussed. A ~~novel~~ wind sensor which relies on thermo-resistive elements is discussed next, followed by a  
111 discussion of the on-board MEMS accelerometer. In Section 4 ~~the~~, ~~the platform's~~ overall performance and  
112 design ~~of the platform~~ are discussed and summarized, from which the conclusions are drawn.

## 113 2 Mobile platform design

### 114 2.1 Circuit design

115 The mobile platform contains a PCB ~~, which been~~ created to embed the MEMS sensors and ~~to~~ facilitate the  
116 electrical circuits. The PCB carries a Digital Low Voltage Range (DLVR) differential pressure sensor, an  
117 anemometer, as well as an accelerometer and ~~barometric~~ barometric pressure sensor, in addition to a GPS  
118 for location and timing purposes (Figure 71-a). The sensors are controlled by a MSP430 microcontroller,  
119 which is integrated on the PCB, and are powered by ~~a an~~ 1800 mAh lithium battery. Protecting the PCB  
120 is done with a weather- and waterproof casing, which has been designed (Figure 71-b) with the dimensions  
121 110mm x 38mm x 15mm.

122 The communication between ~~the~~ microcontroller and MEMS sensor on the PCB is either ~~be~~ done by Inter-  
123 Integrated Circuit (I2C) or Serial Peripheral Interface (SPI), ~~and depends on the sensor and personal~~  
124 ~~preference~~. Both communication methods are bus protocols and allow for serial data transfer. However,  
125 SPI handles full-duplex communication, simultaneous communication between microcontroller and MEMS  
126 sensor, while I2C is half-duplex. Therefore, I2C has the option of clock stretching, ~~and~~ the communication  
127 is stopped whenever the MEMS sensor ~~is not able to~~ cannot send data. Besides, I2C has ~~built-in~~ built-in  
128 features to verify the data communication (e.g., start/stop ~~byte~~ bit, acknowledgement of data). Although the  
129 I2C protocol is favourable, it requires more power. ~~Furthermore, the microcontroller handles the~~

130 ~~The microcontroller runs on self-made software, complementing the required manufacturers electrical and~~  
131 ~~communication protocols. The software allows determining the sample time, sample frequency, and data~~

---

132 storage. The PCB includes a 64 ~~mb~~ MB flash memory, which is used to store the data. The raw output  
133 of the digital MEMS sensors are stored as bits—, and the microcontroller performs no data processing to  
134 save power consumption. To extract data, the platform needs to be connected to a computer. There are no  
135 wireless communication possibilities.

## 136 2.2 Casing design for pressure measurements

137 The mobile sensor platform is designed to measure atmospheric parameters. Hence, a waterproof casing has  
138 been created, by a Formlabs SLA 3D printer [Formlabs, 2020], to protect the PCB. Because of the use of  
139 a Durable Resin, the casing is waterproof and air-tight. At the bottom of the casing, a dome structure is  
140 integrated (Figure 1-c), which acts as an inlet to both the absolute and differential pressure sensors. Note  
141 that the dome is not connected to the inside of the casing. The inlets of both sensors and a capillary are  
142 integrated ~~in~~ within the dome designs ~~—~~ and sealed with ~~silicon~~ silicone glue, avoiding water and air leakage.  
143 Moreover, a Gore-TEX air-vent sticker [Gore-Tex, 2020] is used to cover the dome, which allows airflow but  
144 restrains water and salt in case of measurement near or above the ocean.

145 ~~By this design, the volume~~ Air turbulence can generate dynamic pressure effects or stagnation pressure at the  
146 pressure dome [Raspet et al., 2019]. The stagnation pressure increases with altitude, which results in higher  
147 wind speeds. Atmospheric measurements at altitude might therefore be influenced by stagnation pressure  
148 [Bowman and Lees, 2015, Smink et al., 2019, Krishnamoorthy et al., 2020]. The influence of stagnation pressure  
149 on pressure measurements is theoretically elucidated by [Raspet et al., 2008].

150 The application of a quad-disk might remove the stagnation pressure. Quad-disks are developed to cancel  
151 dynamic pressure effects, and helps detect slower static pressure changes or acoustic perturbations. Theoretical  
152 analysis of the quad-disk indicates that it should remove sufficient dynamic pressure to be useful for turbulence  
153 studies [Wyngaard and Kosovic, 1994]. However, recent studies have shown a minimum effect of quad-disks  
154 on infrasound recordings [Krishnamoorthy et al., 2020]. The casing of the INFRA-EAR is designed and  
155 developed for mobile and rapid deployments at remote places, adding a quad-disk to the design will expand  
156 the dimensions of the casing. Moreover, the pressure dome is positioned at the bottom of the casing, not  
157 orientated towards the dominant wind direction, in order to minimise the stagnation pressure on the pressure  
158 sensors.

159 Furthermore, within this design the casings volume acts as a backing volume for the differential pressure  
160 sensor. One inlet of the differential pressure sensor is attached to the outside (via the dome) while the casing  
161 encloses the other inlet. A PEEKsil™ Red series capillary is attached to the outside of the casing, ensuring  
162 pressure leakage between the backing volume and the atmosphere.

## 163 2.3 GPS

164 For measuring geophysical parameters on a high-resolution temporal scale, it is crucial to know the position  
165 and time of the measurement at high precision. To maintain knowledge regarding the position, a GNS2301  
166 GPS is mounted on the PCB [Texim Europe, 2013]. The GPS has a spatial accuracy of  $\pm 2.5$  m, up to 20km  
167 altitude.

168 Besides providing an accurate position, the GPS also prevents drifting of the ~~internal clock of the microcontroller~~  
169 microcontroller's internal clock under the influence of, for example, weather. The time root mean square jitter,  
170 the deviation between GPS and ~~true~~ actual time, is  $\pm 30$  nanoseconds.

## 171 3 Sensor descriptions

### 172 3.1 Infrasound sensor

173 The human audible sound spectrum is approximately between 20 to 20,000 Hz. Frequencies below 20 Hz  
174 or above 20 kHz are referred to as infrasound and ultrasound, respectively. The movement of large air  
175 volumes generates infrasound signals with amplitudes in ~~the range of millipascals~~ millipascals' range to tens

of pascals. Examples of infrasound sources include earthquakes, lightning, meteors, nuclear explosions, interfering oceanic waves and surf [Campus and Christie, 2010]. Detection of infrasound depends on the ~~strength of the signal~~ signal's strength relative to the noise levels at a remote sensor (array), i.e., the signal-to-noise ratio. The signal strength depends, in turn, on the transmission loss that a signal experiences, while propagating from source to receiver [Waxler and Assink, 2019]. ~~The noise are predominantly determined by local~~ Local wind noise conditions predominantly determine the noise [Raspet et al., 2019], in addition to the sensor self-noise. Due to the presence of atmospheric waveguides and low absorption at infrasonic frequency [Sutherland and Bass, 2004], infrasonic signals can be detected at long distances from an infrasonic source. Assumed that the source levels are sufficiently high so that the long-range signal is above the ambient noise conditions on the receiver side, and the sensor is sensitive enough to detect the signal.

The infrasonic wavefield is conventionally measured with pressure transducers since such scalar measurements are relatively easy to perform. Those measurements can either be performed by absolute or differential pressure sensors. An absolute pressure sensor consists of a sealed aneroid and a measuring cavity ~~which is~~ connected to the atmosphere. A pressure difference within the measuring cavity will deflect the aneroid capsule. The mechanical deflection is converted to a voltage [Haak and De Wilde, 1996]. The measurement principle of a differential infrasound ~~sensors~~ sensor relies on the deflection of a compliant diaphragm, which is mounted on a cavity inside the sensor. The membrane deflects due to a pressure difference inside and outside the microphone, which occurs when a sound wave passes. A pressure equalization vent is part of the design to make the microphone insensitive to slowly varying pressure differences originating from ~~long period~~ long-period changes in weather conditions [Ponceau and Bosca, 2010].

Acoustic particle velocity sensors constitute a fundamentally different class of sensors ~~that~~ measure the airflow over sets of heated wires. This information quantifies the 3-D particle velocity at one location, since the measurement is carried out in three directions ~~[De Bree et al., 2003] [Evers and Haak, 2000]. Although the design of such sensors~~ [De Bree et al., 2003, Evers and Haak, 2000]. Although such sensors' design is more involved and the sensors are far more costly, these sensors do allow for the measurement of sound directivity at one position, besides just the loudness.

Various studies show ~~that the sensor self-noise and~~ sensitivity curves of infrasound sensors ~~[Ponceau and Bosca, 2010] [Merchant, 2015] [Slad and Merchant, 2016] [Marty, 2019] [Nief et al., 2019] lie~~ [Ponceau and Bosca, 2010, Merchant, 2015, S ]. The IMS specifications state that the sensor self-noise should be at least 18 dB below the global low ambient noise curves [Brown et al., 2014], which have been noise curves at 1 Hz [Brown et al., 2014], generated from global infrasound measurements using the IMS. Typical infrasound sensor networks, such as the IMS, ~~make use of analog sensors that are~~ use analogue sensors connected to a separate data logger to convert the measured voltage differences to a digital signal. The ~~characteristic sensitivity of the sensor~~ sensor's characteristic sensitivity determines the sensor resolution, i.e., the smallest difference that ~~can be detected by the sensor~~ the sensor can detect. The resolution of the built-in ~~analog-to-digital~~ analogue-to-digital converters (ADC) and the digitizing voltage range determine the ~~resolution of the datalogger~~ datalogger's resolution. Current state-of-the-art ~~dataloggers~~ data loggers have a 24-bit resolution. New infrasound sensor techniques involve digital outputs ~~since~~ the ADC conversion is realized inside the sensor [Nief et al., 2017, Nief et al., 2019].

### 3.1.1 Sensor design

In this section, the ~~design of the~~ mobile digital infrasound sensor's design is discussed, the KNMI mini-microbarometer (mini-MB). The design of this instrument is based on the following requirements. The sensor should have a flat, linear, response over a wide infrasonic frequency band, e.g., 0.05 - 10 Hz. The sensor should be sensitive to the range of pressure perturbations ~~that occur~~ in this frequency band, which are in the range of millipascals to tens of pascals. Moreover, the ~~self-noise of both the~~ sensor and logging components' self-noise should be below the ambient noise levels of the IMS [Brown et al., 2014]. Taking this into account, the sensor requires as well to be low-cost (i.e., tens of dollars), small in dimensions (i.e., millimeter), and have a low energy consumption (i.e., milliamper).

In this study, infrasound is measured with a differential pressure sensor. The measurement principle relies on the deflection of a diaphragm, which is mounted between two inlets. One inlet is connected to the atmosphere while the other is connected to a cavity (Figure ~~???~~). The digital MEMS DLVR-F50D differential pressure sensor from All Sensors Inc [DLVR, 2019] is used as a sensing element within the mini-MB. This sensor has

227 a ~~dimension of~~ 16.5mm x 13.0mm x 7.3mm dimension and has a linear response between  $\pm 125$  Pa with a  
 228 maximum error band of  $\pm 0.7$  Pa. A Wheatstone bridge senses the ~~deflection of the diaphragm~~ diaphragm's  
 229 deflection by measuring the changes in the piezo-resistive elements attached to the diaphragm. The ~~output~~  
 230 ~~of the sensor~~ sensor's output is an analogue voltage, which is an analog voltage, that is subsequently digitized  
 231 by the built-in 14-bit ADC, offering a maximum resolution of 0.02 Pa/count.

### 232 3.1.2 Theoretical response

233 To measure differential pressure, the atmosphere is sampled through inlet A, which has a low resistance  
 234 ( $R_1$ ), and is connected to a small fore-volume ( $V_1$ ). Inlet B is connected to a backing volume ( $V_2$ ), which is  
 235 connected to the atmosphere by capillary that acts as a high acoustic resistance ( $R_2$ ), which determines the  
 236 low-frequency cut off. Due to an external pressure wave, an observed pressure difference between the two  
 237 inlets occurs and causes a deflection of the membrane ( $C_d$ ) (Figure ~~???~~-a).

238 A theoretical response,  $D(i\omega)$  for a differential pressure sensor, as function of the angular frequency  $\omega (= 2\pi f)$ ,  
 239 has been derived by [Mentink and Evers, 2011] following [Burridge, 1971]:

$$D(i\omega) = \frac{i\omega\tau_2}{1 + i\omega\tau_2A + (i\omega)^2\tau_1\tau_2B} \quad (1)$$

240 where,

$$A = 1 + \frac{\tau_1}{\tau_2} + \frac{R_1}{R_2} + \frac{C_d}{C_2}, \quad B = 1 + C_d\left(\frac{1}{C_1} + \frac{1}{C_2}\right) \quad (2)$$

$$\tau_j = R_j C_j, \quad C_j = \frac{V_j}{P_{\text{atm}}\gamma} \quad (3)$$

241 and  $P_{\text{atm}}$  indicates the ambient barometric pressure, and  $\gamma$  is the thermal conduction of air.  $\tau_j$  represent  
 242 the time constants, and depend on  $R_1$ , and  $R_2$ , which are the resistances of the inlet and capillary, and  
 243  $C_1$ , and  $C_2$ , the capacities of the fore and backing volume.

| KNMI mini-MB sensor specifications |                                                                     |                         |                                                               |
|------------------------------------|---------------------------------------------------------------------|-------------------------|---------------------------------------------------------------|
| Components                         |                                                                     | Conditions              |                                                               |
| Inlet length                       | $l_1 = 3 \times 10^{-2} \text{ m}$                                  | Ambient pressure        | $P_{\text{atm}} = 101 \times 10^3 \text{ Pa}$                 |
| Inlet diameter                     | $a_1 = 2 \times 10^{-2} \text{ m}$                                  | Isothermal gas constant | $\gamma_{\text{iso}} = 1$                                     |
| Capillary length                   | $l_2 = 5 \times 10^{-2} \text{ m}$                                  | Adiabatic gas constant  | $\gamma_{\text{adi}} = 1.403$                                 |
| Capillary diameter                 | $a_2 = 1 \times 10^{-4} \text{ m}$                                  | Thermal conductivity    | $\kappa = 2.5 \times 10^{-2} \text{ W m}^{-1} \text{ K}^{-1}$ |
| Diaphragm sensitivity              | $C_d = 7.5 \times 10^{-11} \text{ m}^4 \text{ s}^2 \text{ kg}^{-1}$ | Heat capacity           | $\rho c_p = 1.1 \times 10^3 \text{ J m}^{-3} \text{ K}^{-1}$  |
| Parameters                         |                                                                     |                         |                                                               |
| Inlet resistance                   | $R_1 = 8.7 \times 10^3 \text{ kg m}^{-4} \text{ s}^{-1}$            | Fore volume             | $V_1 = 4.5 \times 10^{-7} \text{ m}^3$                        |
| Capillary resistance               | $R_2 = 2.3 \times 10^{10} \text{ kg m}^{-4} \text{ s}^{-1}$         | Backing volume          | $V_2 = 16.5 \times 10^{-6} \text{ m}^3$                       |
| Size fore volume                   | $L_1 = 2 \times 10^{-4} \text{ m}$                                  | Size backing volume     | $L_2 = 4 \times 10^{-4} \text{ m}$                            |

Table 1: KNMI mini-MB components, parameter values and standard conditions used in the computations.

244 Figure ~~???~~-a represents the sensor setup from an acoustical perspective, where Figure ~~???~~-b represents the  
 245 electrical ~~analog~~ analogues of the sensor. The acoustical pressure difference ( $p' = p'_1 - p'_2$ ) and volume  
 246 flux ( $f'$ ) are interpreted as an electrical voltage ( $U = U_1 - U_2$ ) and current ( $I$ ). The equivalent of the  
 247 electrical resistance ( $R$ ) corresponds to the ratio between acoustical pressure and the volume flux, whereas the  
 248 capacitance ( $C$ ) relates to the ratio of volume and ambient barometric pressure. The ~~mechanical sensitivity~~  
 249 ~~of the diaphragm~~ diaphragm's mechanical sensitivity ( $C_d$ ) is the ratio of volume change and pressure change  
 250 [Zirpel et al., 1978].

251 From an analysis of Eq. 1, it follows that inlet A dominates in the high-frequency limit. Hence,  $1/2\pi\tau_1$   
 252 indicates the high-frequency cut-off of the sensor:

$$\lim_{\omega \rightarrow +\infty} D(i\omega) \sim \frac{1}{i\omega\tau_1 B} = \frac{1}{\frac{i\omega R_1 V_1}{P_{\text{atm}}} (1 + C_d (\frac{P_{\text{atm}}}{V_1} + \frac{P_{\text{atm}}}{V_2}))} \quad (4)$$

253 While at low frequencies it is obtained that frequencies much smaller than  $1/\tau_2$  are averaged out. Therefore  
 254 the low-frequency limit can be determined as:

$$\lim_{\omega \rightarrow 0} D(i\omega) \sim i\omega = \frac{i\omega R_2 V_2}{P_{\text{atm}}} \quad (5)$$

255 which is controlled by the characteristics of the capillary,  $R_2$ , and the size of the backing volume,  $V_2$ . The  
 256 acoustical resistance of the inlet  $R_1$  and the capillary  $R_2$  is described by using Poiseuille's law [Washburn, 1921],  
 257 which couples the resistance of airflow through a pipe (i.e., an inlet or capillary) to its length  $l_j$  and diameter  
 258  $a_j$ , by:

$$R_j = \frac{8l_j\eta}{\pi a_j^4} \quad (6)$$

259 Where  $\eta$  stands for the viscosity of air, which equals  $18.27 \mu\text{Pa}\cdot\text{s}$  at  $18^\circ\text{C}$ . Combining Equations 5 and 6  
 260 results in the theoretical low-frequency cut-off:

$$f_l \sim \frac{P_{\text{atm}}}{2\pi R_2 V_2} \quad (7)$$

261 Besides the high and low ends of the response, it is of interest to determine the sensor response behavior  
 262 within the passband ( $(\tau_2^{-1} < \omega < \tau_1^{-1})$ ).

$$D(i\omega) \sim (\tau_2^{-1} < \omega < \tau_1^{-1}) = \frac{1}{1 + \underbrace{\tau_1/\tau_2}_1 + \underbrace{R_1/R_2}_2 + \underbrace{C_d/C_2}_3} \quad (8)$$

263 The three contributions in the denominator influence the passband ~~behavior~~behaviour of the sensor:

- 264 1. A broadband frequency response depends on a constant pressure within the reference volume over the  
 265 frequencies of interest (i.e.,  $\tau_1 \ll \tau_2$ )
- 266 2. The pressure difference at the diaphragm is determined by the relative acoustical resistances ~~that are~~  
 267 connected to the sensor. The stability of the sensor response is assured by the ~~large resistance of the~~  
 268 ~~capillary~~capillary's large resistance, because of which  $R_1 \ll R_2$ .
- 269 3. The sensor response depends on the ratio between the volumetric displacement of the diaphragm ( $C_d$ )  
 270 versus the reference volume ( $C_2$ ). For the mini-MB, this term can be neglected.

271 Figure 4-3 shows the theoretical sensor frequency response for amplitude (Fig. 4-3-a) and phase (Fig. 4-3-b) for  
 272 isothermal (red) and adiabatic (blue) behavior. The transitional ~~behavior~~behaviour of the sensor response  
 273 between isothermal and adiabatic ~~behavior~~behaviour will be discussed in the next section.

### 274 3.1.3 Adiabatic-Isothermal transition

275 Due to the presence of heat conduction within the sensor, ~~the compressive behavior of air~~air's compressive  
 276 behaviour is neither isothermal nor adiabatic. Instead, a transition from isothermal to adiabatic ~~behavior~~  
 277 behaviour is expected in the infrasonic frequency band [Richiardone, 1993] [Mentink and Evers, 2011] [Richiardone, 1993, Mentink  
 278 . In the transition zone, the heat capacity ratio can be effectively described by:

$$\bar{\gamma} = \Lambda\gamma \quad (9)$$

where  $\Lambda$  indicates the correction factor, to heat capacity ratio  $\gamma$ . A difference in  $\Lambda$  will influence the capacitance values of the fore and backing volumes (Eq. 3).

Whether a sound wave in an ~~enclosure~~ enclosure behaves isothermally or adiabatically depends on the size of the thermal penetration depth  $\delta_t$  relative to characteristic length  $L$  of the enclosure.  $L$  is defined as the ratio between the enclosure's volume and surface of the enclosure, i.e.  $L = \frac{V}{S}$ . The thermal penetration depth is specified as the gas layer thickness in which heat can diffuse through, during the time of one wave period and is derived as  $\delta_t = \sqrt{\frac{2\alpha}{\omega}}$ . Where  $\alpha = \frac{\kappa}{\rho c_p}$  indicates the thermal diffusivity, defined as ratio of thermal conductivity ( $\kappa$ ) and heat capacity per unit volume ( $\rho c_p$ ). Adiabatic gas behaviour is obtained when  $\frac{\delta_t}{L} \ll 1$ , isothermal gas behaviour when  $\frac{\delta_t}{L} \gg 1$ . The correction factor  $\Lambda$  is a function of  $\delta_t/L$ , and is thus ~~frequency~~ frequency-dependent, which can be derived as:

$$|\Lambda| = \sqrt{X^2 + Y^2}, \quad \arg(\Lambda) = \frac{\pi}{2} + \arctan\left(\frac{X}{Y}\right) \quad (10)$$

where

$$X = x(\gamma_{adi} - 1) - \gamma_{adi}, \quad Y = y(\gamma_{adi} - 1) \quad (11)$$

$x$  and  $y$  represent the real and imaginary components of a complex-valued function  $Z(\frac{\delta_t}{L})$ , which is dependent on the geometrical shape of the enclosure and the thermal penetration depth. In between the adiabatic and isothermal limits, the correction factor  $\Lambda$  describes the transition from an adiabatic heat ratio (i.e.,  $\gamma = 1.4$ ) to an isothermal heat ratio, i.e.  $\gamma = 1$ . The transition frequency  $\bar{f}$  defines the point where the maximum correction of  $\Lambda$  occurs, i.e., for which  $L\delta_t \approx 1$ , from which follows that  ~~$\bar{f} = \frac{\alpha}{\pi L^2}$~~   $\bar{f} = \frac{\alpha}{\pi L^2}$ .

In the case of the mini-MB, the fore and backing volume have different shapes and sizes. The backing volume can be described as a long cylinder,  $L_2$ , whereas the fore volume has ~~the shape of a rectangular~~ a rectangular shape,  $L_1$ . According to those geometries, the transition frequency  $\bar{f}$  of the fore and backing volume are 0.5 and 2.2 Hz, respectively. Since  $\bar{f}_1 \cdot \tau_1 \ll 1$  and  $\bar{f}_2 \cdot \tau_2 \gg 1$  the sensor response above  $\tau_1^{-1}$  is adiabatic, while the response below  $\tau_2^{-1}$  is isothermal. Therefore ~~the main effect of the~~, the thermal conduction correction's main effect is found to be in the passband region (Eq. 8).

The mini-MB has been designed to have a broadband response, therefore only the third term of the dominator is influenced by the correction factor. The effect of thermal conduction to the response is due to ratio  $\frac{C_d}{C_2}$ , which means that the correction factor is characterized by the geometric component of the backing volume.

$$Z\left(\frac{\delta_t}{L}\right) = 1 - \frac{2J_1(\zeta)}{\zeta J_0(\zeta)} \quad (12)$$

here  $Z$  indicates the characteristic correction assuming a long cylinder [Mentink and Evers, 2011].  $\zeta = \sqrt{-2i} \frac{L}{\delta_t}$  indicates the ratio of  $L$  to  $\delta_t$ , while  $J_0$  and  $J_1$  are zeroth and first order Bessel functions of the first kind.

The corrected theoretical sensor response is obtained by substituting  $\bar{C}_j = \frac{C_j}{\Lambda}$ . Figure 13-c shows the value of  $\bar{\gamma}$  in the transition zone between isothermal and adiabatic gas behaviour. The black line in Figure 13-a and b indicates the corrected theoretical sensor response.

In the case of the mini-MB the isothermal-to-adiabatic transition results in an effect on the amplitude of  $\Delta|D| = (\gamma - 1) \frac{C_d}{C_2} = 2.8\%$  and on the phase of less than a degree. Note that  $\frac{C_d}{C_2} \ll 1$  implies that the backing volume is relatively large such that the change in gas ~~behavior~~ behaviour does not influence the sensitivity of the diaphragm.

### 3.1.4 Gore-Tex air-vent

As discussed in Section 3.1.2., the high and low-frequency cut-off are controlled by the resistivity of the inlet and backing volume, respectively. A Gore-Tex V9 sticker is added to the opening of the ~~pressure dome of~~ the casing's pressure dome, which changes the resistivity of the inlets. The Gore-Tex V9 vent allows



318 an airflow of  $2 \times 10^{-8} \text{ m}^3 \text{ s}^{-1} \text{ m}^{-2}$ . Poiseuille's second law, Equation 6, shows the airflow resistivity caused by  
319 an open pipe, and can be re-written as;

$$R_j = \frac{\Delta p}{q_v} \quad (13)$$

320 where  $\Delta p$  indicates the pressure difference between both sides of the pipe, and  $q_v$  the volumetric airflow.

321 For the differential pressures that the mini-MB sensor is able to sense, ranging from 0.02 to 125 Pa,  
322 with a Gore-Tex air-vent area of  $5 \times 10^{-2} \text{ m}^2$ , the equivalent resistivity  $R_{\text{gore}}$  is ranging from  $5 \times 10^5$  to  
323  $3.125 \times 10^8 \text{ kg m}^{-4} \text{ s}^{-1}$ . Comparing the resistivity of the air-vent with the resistivity values of the capillary  
324 and the ~~sensors inlet~~ inlet of the sensor, Table 1 ~~, it follows that only the resistivity of the inlet will be~~  
325 ~~influenced by the air-vent~~ shows that the air-vent will only influence the inlet's resistivity. Assuming the vent  
326 behaves linear, the ~~high frequency~~ high-frequency cut-off of the sensor decreases to a value of around 15 Hz.  
327 Figure 1-3 shows the theoretical transfer function for the mini-MB with a Gore-Tex air-vent attached to the  
328 inlet. The ~~high frequency~~ high-frequency cut-off is shifting between the dotted line and the dashed line, due  
329 to varying values of  $R_{\text{gore}}$ .

### 330 3.1.5 Experimental response

331 The theoretical sensor response describes the high and low-frequency cut-off. ~~From~~ Eq. 7 and the parameters  
332 listed in Table 1 ~~, it follows show~~ that the mini-MB has a theoretical low-frequency cut-off of 0.042 Hz. A  
333 sudden over or under pressure (i.e., impulse response) is applied to the sensor to determine the low-frequency  
334 cut-off experimentally [Evers and Haak, 2000]. The impulse forces the diaphragm out of equilibrium. The  
335 capillary and the size of the backing volume control the time to return into equilibrium again. The time it  
336 takes for the diaphragm to reach equilibrium again corresponds to a characteristic relaxation time ~~that is~~  
337 proportional to the low-frequency cut-off.

338 The outcome of the experimental low-frequency cut-off was determined to be  $0.044 \pm 0.0025 \text{ Hz}$ . The theoretical  
339 ~~low frequency~~ low-frequency cut-off falls within the error margins of the experimental cut-off frequency. ~~Small~~  
340 ~~The small~~ difference between both ~~are is~~ assumed to be due to experimental errors in timing the relaxation  
341 time as well as small imperfections in the used capillary [Evers, 2008]. It follows from Eq. 6 that the low-  
342 frequency cut-off is inversely proportional to the radius to the fourth power. Hence, a one ~~percent per cent~~  
343 deviation in the capillary radius will lead to a four ~~percent per cent~~ deviation in low-frequency cut-off.

### 344 3.1.6 Sensor self-noise

345 The resolution, the smallest change detectable by a sensor, depends on the sensor measurement range and  
346 the number of ADC bits. Having a linear response over a pressure range of  $\pm 125 \text{ Pa}$  and a 14-bit ~~built-in~~  
347 ~~built-in~~ ADC results in a ~~resolution of~~ 0.02 Pa/count resolution. The accuracy of the measurement depends,  
348 besides the ADC resolution, on the ~~internal error of the sensor~~ sensor's internal error, the self-noise. The  
349 self-noise corresponds to the ~~deformation of the diaphragm~~ diaphragm's deformation caused by the mass of  
350 the diaphragm plus the electrical noise from the digitiser. As it is a digital sensor, it is ~~not possible~~ impossible  
351 to follow the conventional methods to determine self-noise [Sleeman et al., 2006]. Therefore the self-noise is  
352 determined by opening both inlets to a closed pressure chamber, ensuring no pressure difference between  
353 ~~both inlets~~ them. The outcome stated that the self-noise falls within the sensor's maximum error band ~~of~~  
354 ~~the sensor~~,  $\pm 0.7 \text{ Pa}$  [DLVR, 2019]. Since no backing volume is used, and the cavities at both sides of the  
355 diaphragm are small, the relation  $\frac{C_d}{C_2}$  changes (Eq. 8). Due to this, it is necessary to correct the sensor  
356 response for the adiabatic to isothermal transition. (Section 3.1.3).

357 The ~~consistency of the~~ self-noise consistency is determined by calculating the Power Spectral Density (PSD)  
358 curves for each hour over a test period of 24 hours [Merchant and Hart, 2011]. Figure 24-a shows in black  
359 the average 90 percentile confidence interval of the self-noise. Note that the instrumental self-noise exceeds  
360 the global low noise model [Brown et al., 2014] at frequencies above 0.4 Hz. Compared to high-fidelity  
361 equipment that typically ~~fall completely~~ falls entirely below the global low noise models, such self-noise levels  
362 are relatively high, yet comparable to levels ~~that are~~ attained by similar sensor designs [Marcillo et al., 2012].

---

363 Furthermore, note that the self-noise follows the dynamic range of a 12-bit ADC, as indicated by the gray  
364 dotted line [Sleeman et al., 2006]. The sensor has a maximum 'no missing code' of 12-bits, the effective  
365 number of bits [DLVR, 2019].

### 366 3.1.7 Sensor comparison

367 A comparison between the mini-MB and a Hyperion IFS-5111 sensor [Merchant, 2015] is made to assess the  
368 ~~performance of the~~ mini-MB performance relative to the reference Hyperion sensor. Both sensors have been  
369 placed inside a cabin next to the outside sensor test facility at the leading author's institute. There is a con-  
370 nection to the outside pressure field through air holes in the wall of the cabin. The Hyperion sensor has been  
371 configured with a high-frequency (~~HF~~) shroud. Figure 24-a and b show the PDF [Merchant and Hart, 2011]  
372 of the data recorded by the mini-MB and the Hyperion sensor, respectively. Both sensors resolved the char-  
373 acteristic microbarom peak around 0.2Hz [Christie and Campus, 2010]. The spectral peaks above 10 Hz  
374 correspond to resonances that exist inside the measurement shelter.

375 A direct comparison of the pressure recordings ~~is are~~ shown in Figures 24-c, -d, and -e. Figure 2-c shows the  
376 absolute difference in amplitude over frequency, where panel d indicates the phase difference between both  
377 sensors. Panel e shows the relative difference between the mini-MB and the Hyperion sensor. The sensors  
378 are in good agreement over the passband frequencies. A larger deviation is shown for the low end ( $f < 0.07$   
379 Hz) and high end frequencies ( $f > 8$  Hz). At frequencies between 0.07 and 1 Hz, the pressure values are  
380 positively biased by  $5 \pm 1$  dB, which equals ~~an error a measurement error by the KNMI mini-MB~~ of  $\pm 0.005$   
381 Pa (Figure 24-e). Above 1 Hz, the pressure values are biased by  $10 \pm 5$  dB, which equals ~~an a measurement~~  
382 error of  $\pm 0.02$  Pa.

383 The backing volume causes a deviation in the ~~low frequency spectrum is caused by the backing volume. The~~  
384 ~~high frequency low frequency spectrum. The high frequency~~ deviation is due to the relatively high noise level  
385 of the mini-MB. For the higher frequencies, the mini-MB PDF follows the 12-bit dynamic range. Only in case  
386 of significant events or loud ambient noise, the sensor ~~is capable of sensing can sense~~ pressure perturbations  
387 in the high-frequency range. Nonetheless, ~~over the entire frequency band the the~~ mini-MB falls within a 30  
388 dB error range over the entire frequency band compared to the Hyperion IFS-5111 sensor.

## 389 3.2 Meteorological parameters

390 The detectability of infrasound is directly linked to wind noise conditions and the ~~stability of the atmosphere in~~  
391 ~~the surrounding of the infrasound sensor, atmosphere's stability in the infrasound sensor's surrounding~~ since  
392 noise levels are increased when turbulence levels are high. Therefore, it is beneficial to have simultaneous  
393 measurements of the basic meteorological parameters, i.e., pressure, wind and temperature. The sub-sections  
394 below describe the different meteorological measurements contained on the sensor platform.

### 395 3.2.1 Barometric pressure sensor

396 The barometric pressure is sensed by the LPS33HW sensor [STMicroelectronics, 2017], which is part of the  
397 pressure dome. Similarly to the differential pressure sensor, piezo-resistive crystals measure the barometric  
398 pressure.

399 Calibration tests are performed within a pressure chamber, in which a cycle of static pressures between 960  
400 and 1070 hPa can be produced. Besides the MEMS sensor, the chamber is equipped with a reference sensor.  
401 This procedure resulted in a calibration curve, which describes the ~~pressure dependent pressure dependent~~  
402 systematic bias. After correcting for the bias, the LPS sensor has an accuracy of  $\pm 0.1$  hPa, i.e., the LPS  
403 sensors measures values ~~that are~~ within  $\pm 0.1$  hPa of the value measured by the KNMI reference sensor.  
404 Furthermore, the LPS sensor has been ~~field tested, along field tested (Figure 5-a), along with~~ a Paroscientific  
405 Digiquartz 1015A barometer, which has an accuracy of 0.05 hPa. From the distribution of observations, it  
406 can be estimated that the LPS sensor has a precision of  $\pm 0.1$  hPa for 93% of the time (Figure 5-b). For the  
407 remainder, the maximum deviation was  $\pm 0.15$  hPa.

---

### 3.2.2 Wind sensor

The pressure field at infrasonic frequencies consists, in addition to coherent acoustic signals, to a large degree of pressure perturbations due to wind and turbulence ~~and which is generally referred to as wind noise~~ [Walker and Hedlin, 2010]. ~~Wind noise~~ [Walker and Hedlin, 2010]. ~~This turbulent energy~~ is present over the complete infrasonic frequency range with a typical noise amplitude level decrease with increasing frequencies, following a  $f^{-5/3}$  slope [Raspet et al., 2019].

~~For the reduction of wind noise~~ ~~To reduce wind turbulence interference with the acoustic perturbations,~~ a Wind-Noise-Reduction-System (WNRS) can be put in place [Walker and Hedlin, 2010] [Raspet et al., 2019] [Walker and Hedlin, 2010, Raspet et al., 2019]. Most WNRSs ~~applied~~ consist of a non-porous pipe rosette, with low impedance inlets at ~~the end of each pipe~~ ~~each pipe's end~~. All pipes are connected to four main pipes, which connect to the microbarometer. Doing so, the atmosphere is sampled over a larger area, and thus small incoherent pressure perturbations (e.g., wind) are filtered out.

The sensor presented in this paper is designed for mobile sampling campaigns. In such cases, the application of similar WNRS filters cannot be attained. Not having a WNRS decreases the SNR, measuring wind with an anemometer will give an insight into the wind conditions. Therefore, a simultaneous measurement of wind and infrasound provides better insight into the infrasonic SNR conditions.

#### Sensor design

~~To measure the wind conditions,~~ ~~a~~ A 2D ~~omni-directional~~ ~~omnidirectional~~ heat mass flow sensor has been designed ~~to measure the wind conditions~~, which is a robust and passive anemometer (Figure 36-a). The sensor is built with a central heating element, which heats ~~up~~ to approximately 80°C, and is circularly surrounded by six TDK thermistors [TDK, 2018]. Depending on the wind direction and speed, the temperature field around the center element is modified. The wind speed and direction can be estimated from the 2D temperature gradient, i.e., its absolute value and direction.

#### Theoretical response

The six sensing elements are placed within a distance of one centimeter from the heating element, while two thermistors and the heating element are at a spatial angle of 60°. The thermistors ~~are used to~~ measure the temperature gradient ~~that is~~ caused by the wind flow ~~and~~ since the resistance is strongly sensitive to temperature. The thermistors are made of semiconductor material and have a negative temperature coefficient. The resistance decreases non-linearly with increasing temperature. The Steinhart-Hart equation approximately describes the temperature  $T$  as a function of resistance value  $R_\Omega$  [Steinhart and Hart, 1968]:

$$\frac{1}{T} = C_{\Omega_1} + C_{\Omega_2}(\ln(R_\Omega)) + C_{\Omega_3}(\ln(R_\Omega))^3 \quad (14)$$

where  ~~$C_{\Omega_1}$ ,  $C_{\Omega_2}$ , and  $C_{\Omega_3}$~~   ~~$C_{\Omega_1}$ ,  $C_{\Omega_2}$ , and  $C_{\Omega_3}$~~  are the thermistor constants ~~and~~ ~~which can be received by the manufacturer~~ [TDK, 2018]. ~~However, they can as well~~ be determined by taking three calibration measurements, for which the temperature and resistance are known, and solving the three equations simultaneously. Figure 36-b shows the sensitivity curve for the TDK thermistor. The thermistor has a relative value of  $1\Omega$  at 25°C, and a precision of  $\pm 4\%/^\circ\text{C}$ , which leads to a 0.05°C error. ~~In the next section, this~~ ~~This~~ error value is placed in context by modeling the expected temperate difference under representative meteorological conditions ~~in the next section~~.

#### Numerical sensor response

The heating element needs to ~~be able to~~ transfer a minimum temperature difference around the sensing elements (i.e., the sensing elements error). A numerical model has been built in ANSYS [ANSYS.] to define the amount of temperature difference around the sensing elements under different meteorological circumstances. The model is a first approximation of the sensitivity and is based on homogeneous laminar

450 airflow passing by the sensor. Turbulent flow, along the anemometer ~~causes uncertainties in wind direction~~  
 451 ~~and speed~~, caused by the sensor design or casing, generates uncertainties within the measurements.

452 This ~~approach~~ first approximation of sensitivity follows a numerical forward modeling technique to approxi-  
 453 mate the ~~shape of the heat probe and its heat probe's shape and~~ intensity at a sensing element. The model  
 454 was run at stable meteorological parameters (i.e., 8°C air temperature, 50% humidity, and 10 m/s wind  
 455 speed). The outcome shows that under those circumstances, the sensing element experiences a temperature  
 456 difference of around 4°C. Together with the outcome of the ~~sensitivity curve of the thermistors~~ thermistors'  
 457 sensitivity curve, it is concluded that the designed sensor can resolve this airflow and is used to estimate  
 458 wind speed and direction.

### 459 Conversion of sensor output into atmospheric parameters

460 To convert the measured resistivity into atmospheric parameters, a 2D planar temperature gradient has  
 461 been estimated numerically from the discrete set of measurements. The measurement resistivities have been  
 462 transformed into temperature measurements following Eq. 14. Based on those temperatures, a 2D numerical  
 463 temperature gradient has been reconstructed. The problem is analogous to the estimation of the wave-front  
 464 directivity from travel time differences [Szuberla and Olson, 2004].

465 In the present case, there are  $N = 6$  discrete sample points, each with an  $r_j = (x_j, y_j)$  coordinate and a  
 466 temperature value  $T_j$ . The total differential of the temperature describes the variation of temperature  $T(x, y)$   
 467 as a function of  $x$  and  $y$ :

$$468 \quad dT = \frac{\partial T}{\partial x} dx + \frac{\partial T}{\partial y} dy. \quad (15)$$

469 From equation 15, it follows that we can determine the two dimensional gradient  $\nabla T = (\frac{\partial T}{\partial x}, \frac{\partial T}{\partial y})$  by setting  
 470 up a system of  $N$  equations. In this case, the number of unknowns is two, and thus the gradient could be  
 471 estimated by two measurements. However, in practice, errors are introduced due to measurement errors.  
 472 Therefore the set of equations becomes inconsistent, which leads to nonsensical solutions. The unknown set  
 473 of parameters is solved by over-determining the system in a least-squares sense to overcome this problem.  
 474 Equation 15 can be rewritten in terms of a matrix-vector system:

$$475 \quad \mathbf{y} = \mathbb{X}\mathbf{p} + \epsilon \quad (16)$$

476 where  $\mathbf{y}$  represents the temperature difference between two measurement points, matrix  $\mathbb{X}$  represents the  
 477  $M = \frac{N(N-1)}{2}$  pair-wise separations and  $\mathbf{p}$  represents the temperature gradient  $\nabla T$ . It is assumed that the  
 478 measurement errors  $\epsilon$  can be described by a normal distribution, i.e. a random variable with mean  $E(\epsilon) = 0$   
 479 and variance  $Var(\epsilon) = \sigma^2$ . It can be shown that the least-squares estimate of  $\mathbf{p}$ , here labeled  $\hat{\mathbf{p}}$ , can be  
 480 obtained by solving the following equation:

$$481 \quad \hat{\mathbf{p}} = (\mathbb{X}^\dagger \mathbb{X})^{-1} \mathbb{X}^\dagger \mathbf{y} \quad (17)$$

$$482 \quad \mathbf{p}_x = \frac{\hat{\mathbf{p}}_x}{\hat{\mathbf{p}}_x^2 + \hat{\mathbf{p}}_y^2}, \quad \mathbf{p}_y = \frac{\hat{\mathbf{p}}_y}{\hat{\mathbf{p}}_x^2 + \hat{\mathbf{p}}_y^2} \quad (18)$$

483 where  $\dagger$  represents the transpose operator, the solution satisfies equation 16 with the constraint that the sum  
 484 of squared errors is minimized. The matrix  $\mathbb{X}$  and the error term  $\epsilon$  determine the solution's accuracy. If a  
 485 Gaussian distribution can represent the measurement errors, it can be shown that the least-squares solution  
 486 is unbiased.

487 Bases on the 2D reconstruction of the temperature gradient (Equation 18), the wind direction and speed is  
 488 resolved, with an estimated accuracy. Furthermore, this method allows determining the uncertainty based  
 489 on geometric sensor set-up [Szuberla and Olson, 2004]. Figure 6-c shows the least-squares error analyses of

the sensor design (Figure 6-a). It stands out that the uncertainty increases when one element is positioned close to the wind flow (i.e., at 60°).

## Reference calibration

Experimental calibration of the anemometer has been performed at the KNMI's calibration lab. The calibration lab features a wind tunnel, which generates a laminar airflow ranging between 0 - 20 m/s. Within the wind-tunnel, two mechanical anemometers are installed, which serve as reference sensors. ~~The mobile platform with~~ With its MEMS anemometer, the mobile platform is installed right below one of the reference sensors to ensure that the mobile platform does not obstruct the laminar flow in the tunnel.

The calibration procedure consists of multiple independent calibration tests that will be described next. First, the sensor is placed inside the wind tunnel while there is no airflow. This way, the relative difference between the sensing elements is determined, the so-called zero-measurement. ~~By correcting for the relative difference,~~ ~~the~~ The sensor is corrected for the internal bias by correcting for the relative difference, which varies around  $\pm 25$  ohm. After correcting ~~for~~ the sensor bias, the sensor is placed within the horizontal plane (i.e., with a pitch angle of 0°) at different angles ~~with respect to the air flow~~ concerning the airflow. For every angle, the flow speed is varied between 0 ~~to~~ to 20 m/s.

The calibration shows that the measured resistance of the thermistors increases with increasing wind speeds. High wind speeds increasingly cool down the thermistors, resulting in higher resistances. ~~Figure 3-e shows the measured resistance of the six thermistor over the~~ 6-d shows the six thermistors' measured resistance over the actual wind speed. ~~To convert resistance into wind speed, a polynomial curve has been fitted over the average measured resistance (Fig. 3-e, black line).~~

~~The accuracy of the wind direction is determined by interpolating the measured velocities into a gradient field over the sensor. The wind direction is obtained by calculating the mean gradient vector of this gradient field.~~ wind direction and the accuracy of the anemometers have been determined according to Eq. 17.

Three different sensor set-ups show the accuracy and precision over increasing wind speeds as a function of directivity. The outcome of calibration set-ups 1 (270°), 2 (90°), and 3 (60°) are shown respectively in Figure ~~3-d, 6-e, and f.~~ The mean direction over all wind speeds, for the three set-ups, ~~are 93°, 265°, and 62°~~ is 89°, 272°, and 57°. The standard deviation shows that the ~~accuracy of the sensor is ±18°~~ sensor's accuracy is ±5°. Furthermore, it is shown that the precision of the wind direction increases with increasing wind speeds.

The resolved wind speeds by the anemometer and the difference with the correct wind speed are shown in Figure 6-e. The colors indicate the difference between resolved wind speed and correct wind speed within the wind tunnel. The mean deviation between resolved and correct wind speed is ±2 m/s. Again, it is shown that the accuracy increases with increasing wind speeds.

## 3.3 Accelerometer

The sensing element of the infrasound sensor on this platform is a sensitive diaphragm. Strong accelerations of the platform will cause a deflection of the diaphragm and may obscure infrasonic signal levels. In addition, such accelerations may be ~~interpreted erroneously misinterpreted~~ as infrasound if no independent accelerometer information is available. To be able to separate the mechanical response of the sensor from actual signals of interest, the platform measures accelerations for which the LSM303, a 6-axis inertial measurement unit (IMU), is deployed [STMicroelectronics, 2018]. The LSM303 consists of a 3-axis accelerometer and 3-axis magnetometer. The measurement range of the accelerometer varies between approximately 2-16 g. The magnetometer is out of the scope of this study ~~and~~ and therefore neglected for the remainder.

Accelerometers measure differential movement between the gravitational field vector and its reference frame. In the absence of linear acceleration, the sensor measures the rotated gravitational field vector, which can be used to calibrate the sensor. A rotational movement of the sensor will result in ~~an~~ acceleration. The IMU is a digital sensor with a built-in 16-bits ADC and has a resolution of 0.06 mg when choosing the lowest measurement range.

A comparison test has been carried out in the seismic pavilion of the author's institute. Inside this pavilion, the LSM is compared to a Streckeisen STS-2 seismometer connected to a Quanterra Q330, as a reference

---

534 sensor [KNMI, 1993]. Both sensors are installed on pillars, to ensure a good coupling between the subsurface  
535 and the sensor. The comparison test, which is based on 24 hours of recording, shows that the accuracy of the  
536 LSM303 3-axis accelerometer is  $\pm 1.5$  mg ( $1.5$  cm/s<sup>2</sup>). Figure ??-7 shows the PDF's of the comparison test for  
537 the MEMS and STS-2 sensor. While the sensors are deployed on the same seismic pillar, and are thus subject  
538 to similar seismic noise conditions, the MEMS sensor ~~was not able to~~ could not measure ambient seismic  
539 noise (~~[Peterson, 1993] [McNamara and Buland, 2004]~~[Peterson, 1993, McNamara and Buland, 2004]) due to  
540 its high self-noise level. The LSM accelerometer exceeds both the U.S. Geological Survey New High Noise  
541 Model (NHNM) [Peterson, 1993] ~~as well as~~ and the STS-2 reference sensor by at least 35 dB.

542 It is therefore unlikely to use this IMU for monitoring purposes of ambient seismic noise or teleseismic events.  
543 Previous studies drew similar conclusions concerning the performance of MEMS accelerometers. Various cal-  
544 ibration set-ups are considered while comparing MEMS accelerometers with conventional accelerometers of  
545 geophones ~~[Hons et al., 2008] [Albarbar et al., 2009] [Anthony et al., 2019]~~[Hons et al., 2008, Albarbar et al., 2009, Anthony  
546 , each concluding that the accuracy of the MEMS is not sufficient for recording ambient seismic noise. How-  
547 ever, strong local events or ~~in case of extremely noisy~~ boisterous environments the MEMS sensor will ~~be able~~  
548 ~~to~~ resolve those seismic signals.

## 549 4 Discussion and Conclusion

550 In this study, the constructional efforts and calibration protocols of the ~~"infrasound-logger"~~ INFRA-EAR  
551 are presented. The ~~"infrasound-logger"~~ INFRA-EAR is a low-cost mobile multidisciplinary sensor platform  
552 for the monitoring of geophysical quantities ~~and~~. It includes sensors for the measurement of infrasound,  
553 acceleration, as well as barometric pressure and wind.

554 The platform uses the newest sensor technology, i.e., digital MEMS, which have a ~~built-in~~ built-in ADC.  
555 The MSP430 programable microcontroller unit controls the sampling of the ADC and the storage of the data  
556 samples. A MEMS GPS is a unit to determine the positioning and to prevent clock-drift. Due to the small  
557 dimension of MEMS, and their low energy consumption, the "infrasound-logger" is a pocket-size measurement  
558 platform, powered by an 1800 mAh lithium battery. The platform does not require any infrastructure (e.g.,  
559 data connection, power supply and specific mounting) like commonly used for the deployment of high-fidelity  
560 systems, which makes it mobile and allows rapid deployments ~~as well as~~ and measurements at remote places.

561 The ~~"infrasound-logger"~~ INFRA-EAR is specifically designed to measure infrasound. The platform hosts the  
562 KNMI mini-MB, ~~which is~~ a novel design with a pressure dome as inlet, the casing as backing-volume with a  
563 PEEKsil capillary, and the DLVR-F50D as sensing element. The low-frequency cut-off of mini-MB depends  
564 on the size of the backing volume, and the ~~characteristics of the capillary~~ capillary characteristics. The  
565 high-frequency cut-off depends on the ~~inlet parameters of the mini-MB~~ mini-MB inlet parameters, which is  
566 partly controlled by a Gore-Tex air-vent (Section 3.1.4). The "infrasound-logger" has a low-frequency cut-off  
567 frequency of  $0.044 \pm 0.0025$  Hz, while the high-frequency cut-off varies between 15 and 90 Hz.

568 A comparison between the mini-MB and a Hyperion infrasound sensor [Merchant, 2015] ~~has~~ have shown the  
569 differences in amplitude and phase (Figure 2. ~~For the passband frequencies band the 4).~~ The mini-MB has an  
570 amplitude difference of 30 dB ~~for the passband frequencies band~~ compared to the Hyperion sensor. ~~For the~~  
571 ~~lower frequencies the~~ The sensors are in good agreement, ~~for the lower frequencies, and~~ both sensors resolved  
572 the characteristic microbarom peak around 0.2 Hz [Christie and Campus, 2010]. ~~The higher frequencies,~~  
573 ~~however,~~ However, the higher frequencies show small deviations, which is due to the relatively high noise  
574 band of the mini-MB. From 8 Hz onward, the ~~PDF of the mini-MB~~ PDF follows the 12-bit dynamic range  
575 of the ADC. Nonetheless, the mini-MB ~~is able to resolve~~ can resolve the infrasonic ambient noise field up to  
576  $\pm 8$  Hz. Only in case of significant events or ~~extremely noisy~~ boisterous conditions, the sensor ~~is capable of~~  
577 ~~sensing~~ can sense pressure perturbations in the higher frequency range.

578 When the ~~wind noise~~ wind noise levels are high, infrasound signals can be masked and remain undetected.  
579 Therefore, the sensor platform presents a ~~robust~~ passive anemometer to give insights ~~in~~ into the wind con-  
580 ditions during infrasonic measurements. The MEMS anemometer is built up as an omnidirectional sensor.  
581 Numerical tests indicate that the temperature difference caused by a wind flow around the thermistors should  
582 be significant to be sensed. For validation, the anemometer has been calibrated inside a wind tunnel. Figure

3-6 shows the outcome of the calibration tests. Based on this outcome, one can conclude that the anemometer can determine wind direction and wind speed, given that the sensor is calibrated. The sensor measures a difference in resistance, which is ~~relative compared to~~ converted into a temperature measurement. The ~~discreet~~ temperature measurements are used to reconstruct a 2D planar temperature gradient, which is used to determine the wind speed and direction. ~~Although the sensor is resolving wind direction and speed, the resolution is poor compared to the reference sensors. For the estimation of a~~ Based on the calibration tests within the windtunnel, it is shown that the anemometer has a directional accuracy of  $\pm 5^\circ$ , and a wind speed accuracy of  $\pm 2\text{m/s}$ . Nonetheless, it is shown in Figure 6-c that the anemometer has geometrical uncertainties, due to its design. Future anemometers, 2D gradient (assuming the gradient is uniform), in principle only four degrees of freedom are needed: 2 in the x-direction, 2 in the y-direction. Therefore, the proposed system should be over-determined in this case. Nonetheless, the resolution outcome of the MEMS anemometer shows opposite. It is likely that the temperature gradient is not strong enough to provide a wind direction resolution higher than  $30^\circ$ . A slight deviation in z-position (a height difference) between the thermistors can cause such a reduction of temperature gradient. ~~hot-wire, should consider a minimum of 8 thermistors to exclude geometric uncertainties [Szuberla and Olson, 2004].~~

Besides an anemometer and infrasound sensor, the platform also hosts a barometric pressure sensor, an accelerometer, and GPS. Each sensor has been calibrated and compared with a reference sensor. It was shown that the accelerometer has a relatively high self-noise, which restricts the sensor's ability to determine the ambient seismic noise [Peterson, 1993] [McNamara and Buland, 2004] [Peterson, 1993, McNamara and Buland, 2004]. Nonetheless, the sensor will most likely resolve local transient events, which influences the ~~sensitivity of the mini-MB's sensitivity~~ and its ability to resolve infrasonic sources. The barometric sensor shows good agreement with a reference sensor (Figure ??5). Absolute pressure perturbations due to the weather are resolved. After calibration, the sensor has a precision of  $\pm 0.1\text{ hPa}$  for 93% of the time. For the remainder maximum deviation, compared to the reference sensor, was  $\pm 0.15\text{ hPa}$ .

Calibration tests, performed in this study and previous literature, show that the MEMS sensors perform less than the commonly used high-fidelity sensors. The self-noise of the sensors is a critical problem. Furthermore, the ~~manufacturer of the MEMS sensors highlight there is~~ MEMS sensors manufacturers highlight a significant change of measurement drift [DLVR, 2019] [TDK, 2018] [STMicroelectronics, 2017] [STMicroelectronics, 2018] [DLVR, 2019, TDK, 2018, STMicroelectronics, 2017, STMicroelectronics, 2018], regular calibration is needed. Nonetheless, the MEMS sensor techniques are continuously developing [Jacob et al., 2014] [Johari, 2003]. ~~The design of the "infrasound-logger" [Jacob et al., 2014, Johari, 2003].~~ The INFRA-EAR design is such that the platform can be ~~adjust-adjusted~~ and improved by adding or swapping sensors. Mobile sensor platforms, built up by PCB's and digital MEMS sensors, are therefore scalable, flexible, and ready for various geophysical measurements.

Nonetheless, a low-cost mobile multidisciplinary sensor platform can complement existing high-fidelity geophysical sensor networks. This study showed that, as long as the MEMS are well-calibrated, they perform in agreement with the reference sensors. Therefore, the ~~'infrasound-logger'~~ INFRA-EAR can contribute significantly to providing observations during ~~rapid-deployments, remote or rapid deployments (e.g., weather towers, weather balloons, and scientific balloons)~~, to complement the existing sensor network by increasing the number of observations. Although the sensor data does not fully satisfy the measurement requirements, the ~~improve-improvement~~ of spatial resolution enables stacking the observations. This can be realized by stacking the output of various sensor platforms, ~~or-by-or~~ adding more sensors to the same sensor platform and averaging the output [Nishimura et al., 2019]. Stacking improves the signal-to-noise ratio ~~increases~~ by  $1/\sqrt{N}$ , where  $N$  is the number of observations. ~~Furthermore, the platform enables measurement campaigns at remote places (e.g., weather towers, weather balloons)~~

Initially, the INFRA-EAR has been designed as a bilogger for the monitoring of atmospheric parameters. In total 25 INFRA-EAR's are produced and used during the 2020 field campaign at Crozet Island in the Southern Ocean. The loggers have been fitted to the Southern Ocean's largest seabirds, the Wandering Albatross (*Diomedea exulans*). The Southern Hemisphere has very little in situ measurements, due to limited shore areas. The use of INFRA-EAR in such areas is ideal for monitoring geophysical parameters, comparing in situ measurements, and comparing INFRA-EAR data with model data.

---

## 634 Acknowledgements

635 The authors thank the calibration lab of the KNMI for their collaboration, explaining the different calibration  
636 techniques, and allowing experimental tests at their facility. Furthermore, the authors would like to thank  
637 Sam Patrick, Mathieu Basille, Susana Clusella-Trullas, Thomas Clay, Rocio Joo, and Jeff Zeyl for their input  
638 regarding ~~the selection of the~~ [selecting the](#) used MEMS sensors. All figures have been created using Generic  
639 Mapping Tools [Wessel et al., 2013]. O.d.O and J.A are funded by a Human Frontier Science Program Young  
640 Investigator Grant (SeabirdSound - RGY0072/2017). L.E contribution is funded through a VIDI project from  
641 the Dutch Research Council (NWO), project number 864.14.005. [The manuscript is a guidance for the design,  
642 development and calibration of multidisciplinary sensor platforms. Based on the manuscript, sensor platforms  
643 can either be self-produced or ordered by Dominique Filippi \(co-author\) of Sextant Technology Inc.](#)

## 644 References

- 645 [Albarbar et al., 2009] Albarbar, A., Badri, A., Sinha, J. K., and Starr, A. (2009). Performance evaluation  
646 of mems accelerometers. *Measurement*, 42(5):790–795.
- 647 [Anderson et al., 2018] Anderson, J. F., Johnson, J. B., Bowman, D. C., and Ronan, T. J. (2018). The gem  
648 infrasound logger and custom-built instrumentation. *Seismological Research Letters*, 89(1):153–164.
- 649 [ANSYS, ] ANSYS. Ansys academic research mechanical, release 18.1.
- 650 [Anthony et al., 2019] Anthony, R. E., Ringler, A. T., Wilson, D. C., and Wolin, E. (2019). Do low-cost  
651 seismographs perform well enough for your network? an overview of laboratory tests and field observations  
652 of the osop raspberry shake 4d. *Seismological Research Letters*, 90(1):219–228.
- 653 [Assink et al., 2018] Assink, J., Averbuch, G., Shani-Kadmiel, S., Smets, P., and Evers, L. (2018). A seismo-  
654 acoustic analysis of the 2017 north korean nuclear test. *Seismological Research Letters*, 89(6):2025–2033.
- 655 [Averbuch et al., 2020] Averbuch, G., Assink, J. D., and Evers, L. G. (2020). Long-range atmospheric infra-  
656 sound propagation from subsurface sources. *The Journal of the Acoustical Society of America*, 147(2):1264–  
657 1274.
- 658 [Blanc et al., 2018] Blanc, E., Ceranna, L., Hauchecorne, A., Charlton-Perez, A., Marchetti, E., Evers, L. G.,  
659 Kvaerna, T., Lastovicka, J., Eliasson, L., Crosby, N. B., et al. (2018). Toward an improved representation  
660 of middle atmospheric dynamics thanks to the arise project. *Surveys in geophysics*, 39(2):171–225.
- 661 [Bowman and Lees, 2015] Bowman, D. C. and Lees, J. M. (2015). Infrasound in the middle stratosphere  
662 measured with a free-flying acoustic array. *Geophysical Research Letters*, 42(22):10–010.
- 663 [Brown et al., 2014] Brown, D., Ceranna, L., Prior, M., Mialle, P., and Le Bras, R. J. (2014). The idc  
664 seismic, hydroacoustic and infrasound global low and high noise models. *Pure and Applied Geophysics*,  
665 171(3-5):361–375.
- 666 [Burridge, 1971] Burridge, R. (1971). The acoustics of pipe arrays. *Geophysical Journal International*, 26(1-  
667 4):53–69.
- 668 [Campus and Christie, 2010] Campus, P. and Christie, D. (2010). Worldwide observations of infrasonic  
669 waves. In *Infrasound monitoring for atmospheric studies*, pages 185–234. Springer.
- 670 [Christie and Campus, 2010] Christie, D. and Campus, P. (2010). The ims infrasound network: Design  
671 and establishment of infrasound stations. In *Infrasound monitoring for atmospheric studies*, pages 29–75.  
672 Springer.
- 673 [Cornes et al., 2020] Cornes, R. C., Dirksen, M., and Sluiter, R. (2020). Correcting citizen-science air tem-  
674 perature measurements across the netherlands for short wave radiation bias. *Meteorological Applications*,  
675 27(1):e1814.



- 
- 676 [D'Alessandro et al., 2014] D'Alessandro, A., Luzio, D., and D'Anna, G. (2014). Urban mems based seismic  
677 network for post-earthquakes rapid disaster assessment. *Advances in Geosciences*.
- 678 [De Bree et al., 2003] De Bree, H.-E. et al. (2003). The microflown: An acoustic particle velocity sensor.  
679 *Acoustics Australia*, 31(3):91–94.
- 680 [DLVR, 2019] DLVR (2019). Technical Report DLVR Series Low Voltage Digital Pressure Sensors. [https://www.allensors.com/datasheets/DS-0300\\_Rev\\_E.pdf](https://www.allensors.com/datasheets/DS-0300_Rev_E.pdf).  
681
- 682 [Evers, 2008] Evers, L. G. (2008). *The inaudible symphony: on the detection and source identification of*  
683 *atmospheric infrasound*. PhD thesis, TU Delft, Delft University of Technology.
- 684 [Evers and Haak, 2000] Evers, L. G. and Haak, H. W. (2000). *The Deelen Infrasound Array: on the detection*  
685 *and identification of infrasound*. Koninklijk Nederlands Meteorologisch Instituut.
- 686 [Fang et al., 2010] Fang, Z., Zhao, Z., Du, L., Zhang, J., Pang, C., and Geng, D. (2010). A new portable micro  
687 weather station. In *2010 IEEE 5th International Conference on Nano/Micro Engineered and Molecular*  
688 *Systems*, pages 379–382. IEEE.
- 689 [Formlabs, 2020] Formlabs (2020). *Technical Report Formlabs 3D printer*. Formlabs.
- 690 [Garcia-Marti et al., 2019] Garcia-Marti, I., de Haij, M., Noteboom, J. W., van der Schrier, G., and de Valk,  
691 C. (2019). Using volunteered weather observations to explore urban and regional weather patterns in the  
692 netherlands. *AGUFM*, 2019:IN22A–08.
- 693 [Gore-Tex, 2020] Gore-Tex (2020). *Technical Report Gore TEX air vents*. Gore-Tex.
- 694 [Grangeon and Lesage, 2019] Grangeon, J. and Lesage, P. (2019). A robust, low-cost and well-calibrated  
695 infrasound sensor for volcano monitoring. *Journal of Volcanology and Geothermal Research*, 387:106668.
- 696 [Green et al., 2012] Green, D., Matoza, R., Vergoz, J., and Le Pichon, A. (2012). Infrasonic propagation  
697 from the 2010 eyjafjallajökull eruption: Investigating the influence of stratospheric solar tides. *Journal of*  
698 *Geophysical Research: Atmospheres*, 117(D21).
- 699 [Grimmett et al., 2019] Grimmett, D., Plate, R., and Goad, J. (2019). Measuring infrasound from the mar-  
700 itime environment. In *Infrasound Monitoring for Atmospheric Studies*, pages 173–206. Springer.
- 701 [Haak and De Wilde, 1996] Haak, H. W. and De Wilde, G. (1996). *Microbarograph systems for the infrasonic*  
702 *detection of nuclear explosions*. Royal Netherlands Meteorological Institute, Seismology Division.
- 703 [Homeijer et al., 2011] Homeijer, B., Lazaroff, D., Milligan, D., Alley, R., Wu, J., Szepesi, M., Bicknell, B.,  
704 Zhang, Z., Walmsley, R., and Hartwell, P. (2011). Hewlett packard’s seismic grade mems accelerometer.  
705 In *2011 IEEE 24th International Conference on Micro Electro Mechanical Systems*, pages 585–588. IEEE.
- 706 [Homeijer et al., 2014] Homeijer, B. D., Milligan, D. J., and Hutt, C. R. (2014). A brief test of the hewlett-  
707 packard mems seismic accelerometer. *US Geological Survey Open-file Report*, (2014-1047).
- 708 [Hons et al., 2008] Hons, M., Stewart, R., Lawton, D., Bertram, M., and Hauer, G. (2008). Field data  
709 comparisons of mems accelerometers and analog geophones. *The Leading Edge*, 27(7):896–903.
- 710 [Huang et al., 2003] Huang, Q.-A., Qin, M., Zhang, Z., Zhou, M., Gu, L., Zhu, H., Hu, D., Hu, Z., Xu, G.,  
711 and Liu, Z. (2003). Weather station on a chip. In *SENSORS, 2003 IEEE*, volume 2, pages 1106–1113.  
712 IEEE.
- 713 [Jacob et al., 2014] Jacob, R. T., Manjiyani, Z. A. A., et al. (2014). Development of mems based 3-axis  
714 accelerometer for hand movement monitoring. *International Journal of Computer Science and Engineering*  
715 *Communications*, 2(1):87–92.
- 716 [Johari, 2003] Johari, H. (2003). Development of mems sensors for measurements of pressure, relative hu-  
717 midity, and temperature.

- 
- 718 [KNMI, 1993] KNMI (1993). Netherlands Seismic and Acoustic Network. Royal Netherlands Meteorological  
719 Institute (KNMI), Other/Seismic Network. 10.21944/e970fd34-23b9-3411-b366-e4f72877d2c5.
- 720 [Krishnamoorthy et al., 2020] Krishnamoorthy, S., Bowman, D. C., Komjathy, A., Pauken, M. T., and Cutts,  
721 J. A. (2020). Origin and mitigation of wind noise on balloon-borne infrasound microbarometers. *The*  
722 *Journal of the Acoustical Society of America*, 148(4):2361–2370.
- 723 [Laine and Mougénot, 2007] Laine, J. and Mougénot, D. (2007). Benefits of mems based seismic accelerom-  
724 eters for oil exploration. In *TRANSDUCERS 2007-2007 International Solid-State Sensors, Actuators and*  
725 *Microsystems Conference*, pages 1473–1477. IEEE.
- 726 [Lammel, 2015] Lammel, G. (2015). The future of mems sensors in our connected world. In *2015 28th IEEE*  
727 *International Conference on Micro Electro Mechanical Systems (MEMS)*, pages 61–64. IEEE.
- 728 [Ma et al., 2011] Ma, R.-H., Wang, Y.-H., and Lee, C.-Y. (2011). Wireless remote weather monitoring system  
729 based on mems technologies. *Sensors*, 11(3):2715–2727.
- 730 [Manobianco and Short, 2001] Manobianco, J. and Short, D. A. (2001). On the utility of airborne mems  
731 for improving meteorological analysis and forecasting. In *Conference on Modeling and Simulation of*  
732 *Microsystems*, pages 342–345.
- 733 [Marcillo et al., 2012] Marcillo, O., Johnson, J. B., and Hart, D. (2012). Implementation, characterization,  
734 and evaluation of an inexpensive low-power low-noise infrasound sensor based on a micromachined dif-  
735 ferential pressure transducer and a mechanical filter. *Journal of Atmospheric and Oceanic Technology*,  
736 29(9):1275–1284.
- 737 [Marty, 2019] Marty, J. (2019). The ims infrasound network: current status and technological developments.  
738 In *Infrasound Monitoring for Atmospheric Studies*, pages 3–62. Springer.
- 739 [McNamara and Buland, 2004] McNamara, D. E. and Buland, R. P. (2004). Ambient noise levels in the  
740 continental united states. *Bulletin of the seismological society of America*, 94(4):1517–1527.
- 741 [Mentink and Evers, 2011] Mentink, J. H. and Evers, L. G. (2011). Frequency response and design parameters  
742 for differential microbarometers. *The Journal of the Acoustical Society of America*, 130(1):33–41.
- 743 [Merchant, 2015] Merchant, B. J. (2015). Hyperion 5113/gp infrasound sensor evaluation. *Sandia Report*  
744 *SAND2015-7075*, Sandia National Laboratories.
- 745 [Merchant and Hart, 2011] Merchant, B. J. and Hart, D. M. (2011). Component evaluation testing and  
746 analysis algorithms. *Sandia National Laboratories Technical Report No. SAND2011-8265*.
- 747 [Milligan et al., 2011] Milligan, D. J., Homeijer, B. D., and Walmsley, R. G. (2011). An ultra-low noise mems  
748 accelerometer for seismic imaging. In *SENSORS, 2011 IEEE*, pages 1281–1284. IEEE.
- 749 [Nief et al., 2017] Nief, G., Olivier, N., Olivier, S., and Hue, A. (2017). New optical microbarometer. In  
750 *AGU Fall Meeting Abstracts*, volume 2017, pages A21A–2150.
- 751 [Nief et al., 2019] Nief, G., Talmadge, C., Rothman, J., and Gabrielson, T. (2019). New generations of  
752 infrasound sensors: technological developments and calibration. In *Infrasound Monitoring for Atmospheric*  
753 *Studies*, pages 63–89. Springer.
- 754 [Nishimura et al., 2019] Nishimura, R., Cui, Z., and Suzuki, Y. (2019). Portable infrasound monitoring device  
755 with multiple mems pressure sensors. In *International Congress on Acoustics (ICA)*, pages 1498–1505.
- 756 [Peterson, 1993] Peterson, J. R. (1993). Observations and modeling of seismic background noise. Technical  
757 report, US Geological Survey.
- 758 [Poler et al., 2020] Poler, G., Garcia, R. F., Bowman, D. C., and Martire, L. (2020). Infrasound and gravity  
759 waves over the andes observed by a pressure sensor on board a stratospheric balloon. *Journal of Geophysical*  
760 *Research: Atmospheres*, 125(6):e2019JD031565.

- 
- 761 [Ponceau and Bosca, 2010] Ponceau, D. and Bosca, L. (2010). Low-noise broadband microbarometers. In  
762 *Infrasound monitoring for atmospheric studies*, pages 119–140. Springer.
- 763 [Raspet et al., 2019] Raspet, R., Abbott, J.-P., Webster, J., Yu, J., Talmadge, C., Alberts II, K., Collier, S.,  
764 and Noble, J. (2019). New systems for wind noise reduction for infrasonic measurements. In *Infrasound*  
765 *Monitoring for Atmospheric Studies*, pages 91–124. Springer.
- 766 [Raspet et al., 2008] Raspet, R., Yu, J., and Webster, J. (2008). Low frequency wind noise contributions in  
767 measurement microphones. *The Journal of the Acoustical Society of America*, 123(3):1260–1269.
- 768 [RBOOM, 2017] RBOOM (2017). Specifications for: Raspberry Boom (RBOOM) and 'Shake and Boom'  
769 (RSBOOM). [https://manual.raspberrysshake.org/\\_downloads/SpecificationsforBoom\\_SnB.pdf](https://manual.raspberrysshake.org/_downloads/SpecificationsforBoom_SnB.pdf).
- 770 [Richiardone, 1993] Richiardone, R. (1993). The transfer function of a differential microbarometer. *Journal*  
771 *of Atmospheric and Oceanic Technology*, 10(4):624–628.
- 772 [Shani-Kadmiel et al., 2018] Shani-Kadmiel, S., Assink, J. D., Smets, P. S., and Evers, L. G. (2018). Seismoa-  
773 coustic coupled signals from earthquakes in central italy: Epicentral and secondary sources of infrasound.  
774 *Geophysical Research Letters*, 45(1):427–435.
- 775 [Slad and Merchant, 2016] Slad, G. W. and Merchant, B. J. (2016). Chaparral model 60 infrasound sensor  
776 evaluation. *Technical Report*, pages SAND2016–1902.
- 777 [Sleeman et al., 2006] Sleeman, R., Van Wettum, A., and Trampert, J. (2006). Three-channel correlation  
778 analysis: A new technique to measure instrumental noise of digitizers and seismic sensors. *Bulletin of the*  
779 *Seismological Society of America*, 96(1):258–271.
- 780 [Smink et al., 2019] Smink, M. M., Assink, J. D., Bosveld, F. C., Smets, P. S., and Evers, L. G. (2019). A  
781 three-dimensional array for the study of infrasound propagation through the atmospheric boundary layer.  
782 *Journal of Geophysical Research: Atmospheres*, 124(16):9299–9313.
- 783 [Speller and Yu, 2004] Speller, K. E. and Yu, D. (2004). A low-noise mems accelerometer for unattended  
784 ground sensor applications. In *Unattended/Unmanned Ground, Ocean, and Air Sensor Technologies and*  
785 *Applications VI*, volume 5417, pages 63–72. International Society for Optics and Photonics.
- 786 [Steinhart and Hart, 1968] Steinhart, J. S. and Hart, S. R. (1968). Calibration curves for thermistors. In  
787 *Deep Sea Research and Oceanographic Abstracts*, volume 15, pages 497–503. Elsevier.
- 788 [STMicroelectronics, 2017] STMicroelectronics (2017). *Technical Report STMicroelectronics LPS33HW*.  
789 STMicroelectronics.
- 790 [STMicroelectronics, 2018] STMicroelectronics (2018). *Technical Report STMicroelectronics LSM303*. STMi-  
791 croelectronics.
- 792 [Sutherland and Bass, 2004] Sutherland, L. C. and Bass, H. E. (2004). Atmospheric absorption in the atmo-  
793 sphere up to 160 km. *The Journal of the Acoustical Society of America*, 115(3):1012–1032.
- 794 [Szuberla and Olson, 2004] Szuberla, C. A. and Olson, J. V. (2004). Uncertainties associated with parameter  
795 estimation in atmospheric infrasound arrays. *The Journal of the Acoustical Society of America*, 115(1):253–  
796 258.
- 797 [TDK, 2018] TDK (2018). *Technical Report TDK NTC element G1540*. TDK.
- 798 [Texim Europe, 2013] Texim Europe (2013). *Technical Report Texim Europe GNS2301*. Texim Europe.
- 799 [Walker and Hedlin, 2010] Walker, K. T. and Hedlin, M. A. (2010). A review of wind-noise reduction method-  
800 ologies. In *Infrasound monitoring for atmospheric studies*, pages 141–182. Springer.
- 801 [Washburn, 1921] Washburn, E. W. (1921). The dynamics of capillary flow. *Physical review*, 17(3):273.

- 802 [Waxler and Assink, 2019] Waxler, R. and Assink, J. (2019). Propagation modeling through realistic atmo-  
 803 sphere and benchmarking. In *Infrasound Monitoring for Atmospheric Studies*, pages 509–549. Springer.
- 804 [Wessel et al., 2013] Wessel, P., Smith, W. H., Scharroo, R., Luis, J., and Wobbe, F. (2013). Generic mapping  
 805 tools: improved version released. *Eos, Transactions American Geophysical Union*, 94(45):409–410.
- 806 [Wyngaard and Kosovic, 1994] Wyngaard, J. and Kosovic, B. (1994). Similarity of structure-function pa-  
 807 rameters in the stably stratified boundary layer. *Boundary-Layer Meteorology*, 71(3):277–296.
- 808 [Zirpel et al., 1978] Zirpel, M., Kraan, W., and Mastboom, P.-P. (1978). *Operationele versterkers: een*  
 809 *verzameling schakelingen en formules voor de toepassing van operationele versterkers*. Kluwer.
- 810 [Zou et al., 2014] Zou, X., Thiruvengathanathan, P., and Seshia, A. A. (2014). A seismic-grade resonant mems  
 811 accelerometer. *Journal of Microelectromechanical Systems*, 23(4):768–770.

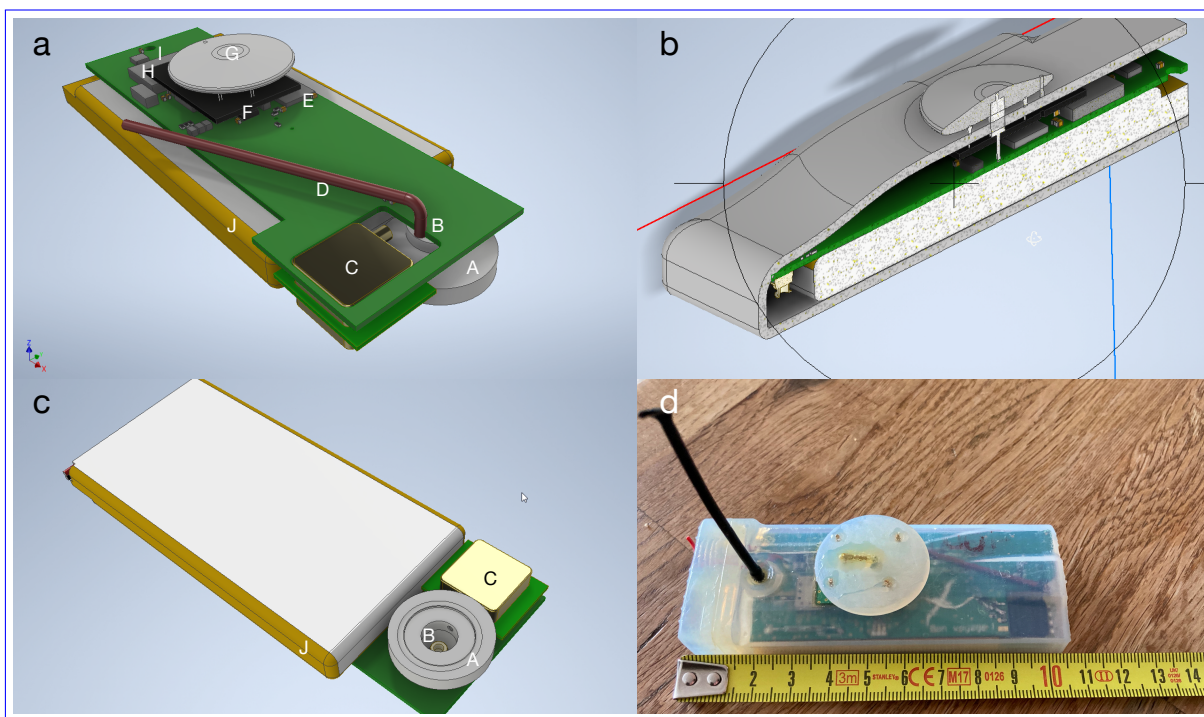

Figure 1: 3D CAD design of (a) the top of the PCB, (b) the casing, (c) the bottom of the PCB with pressure dome, and (d) a picture of the actual platform. The PCB hosts; a pressure dome (a-A/c-A), a barometric pressure sensor (a-B/c-B), a differential pressure sensor (a-C/c-C), a PEEKsil™ Red series capillary (a-D), an accelerometer (a-F), an anemometer (a-F) with [the](#) heating element (a-G), a [microcontroller](#) (a-H), a GPS (a-I), and a lithium battery (a-J/c-J).

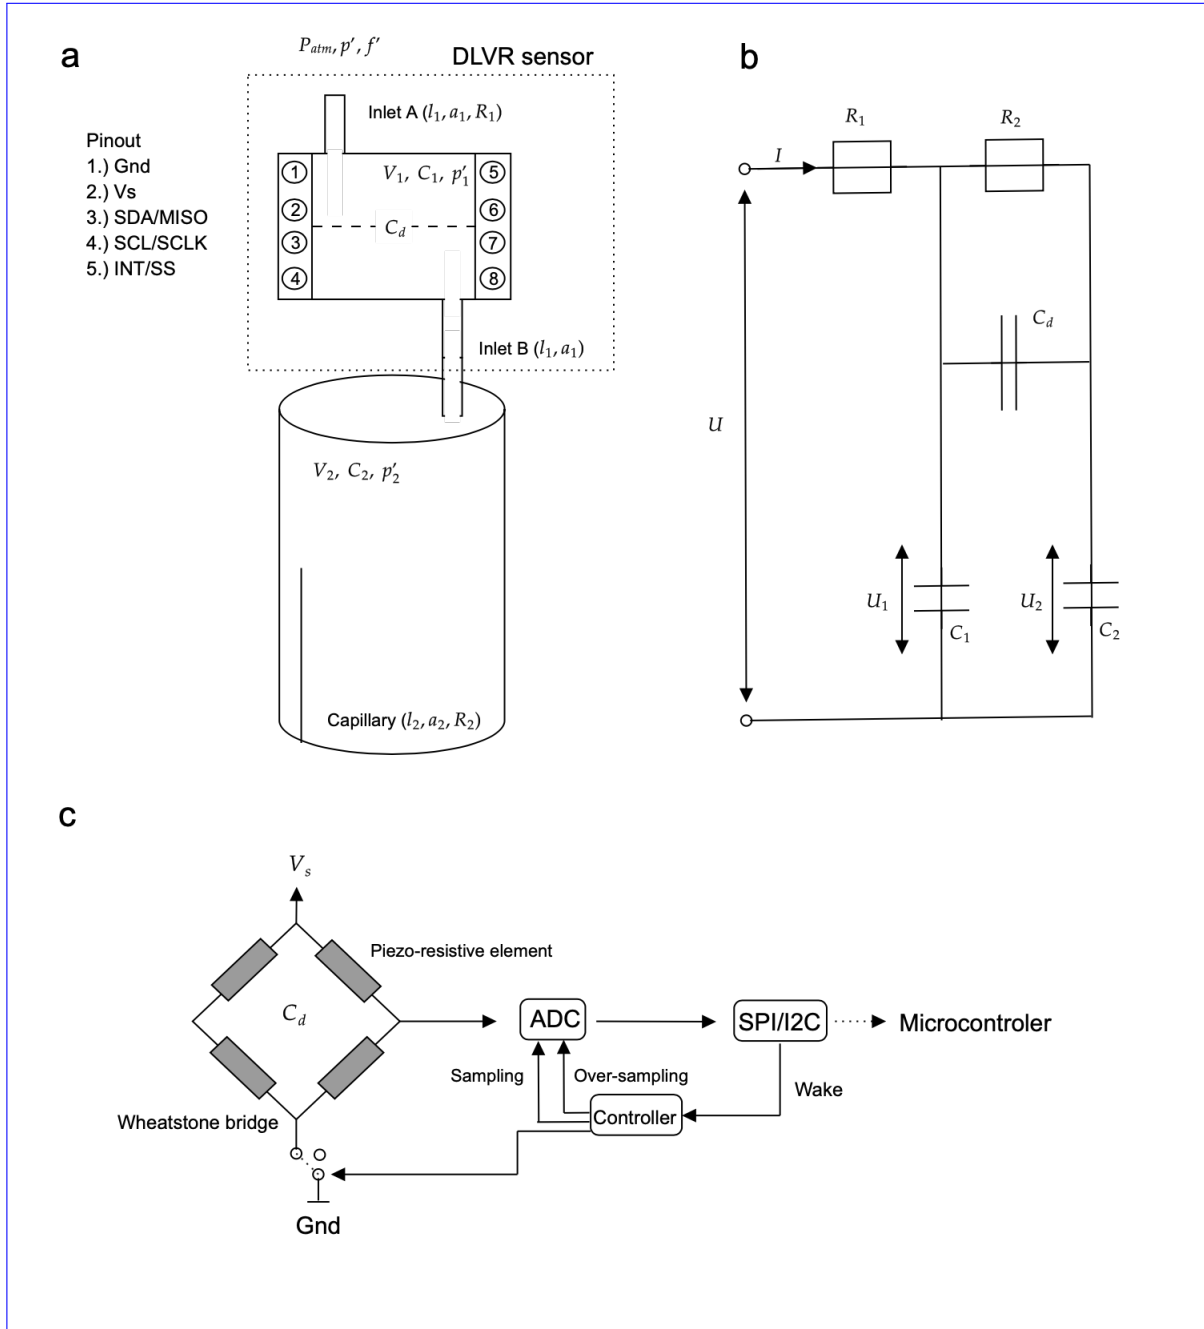

Figure 2: The KNMI mini-MB design with the DLVR sensor and the parameters as listed in Table 1 (a) ~~as~~ well as and the electrical circuit of the mini-MB (b). Panel (c) visualises the DLVR sensor.

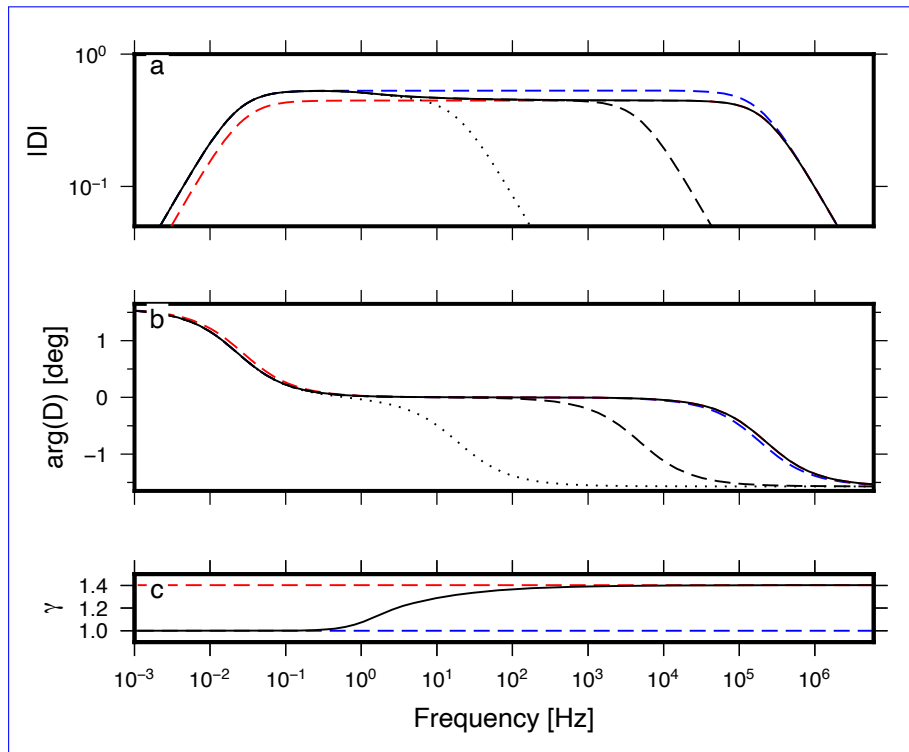

Figure 3: The theoretical sensor frequency response function for (a) amplitude and (b) phase in the case of isothermal and adiabatic gas behaviour in blue and red, respectively. The solid black line indicates the corrected sensor response by  $\bar{\gamma}$  (c), as discussed in Section 3.1.3. The dotted and dashed line indicate the [high-frequency](#) shifting [high frequency](#) cut-off due to  $R_{\text{gore}}$ , as discussed in section 3.1.4.

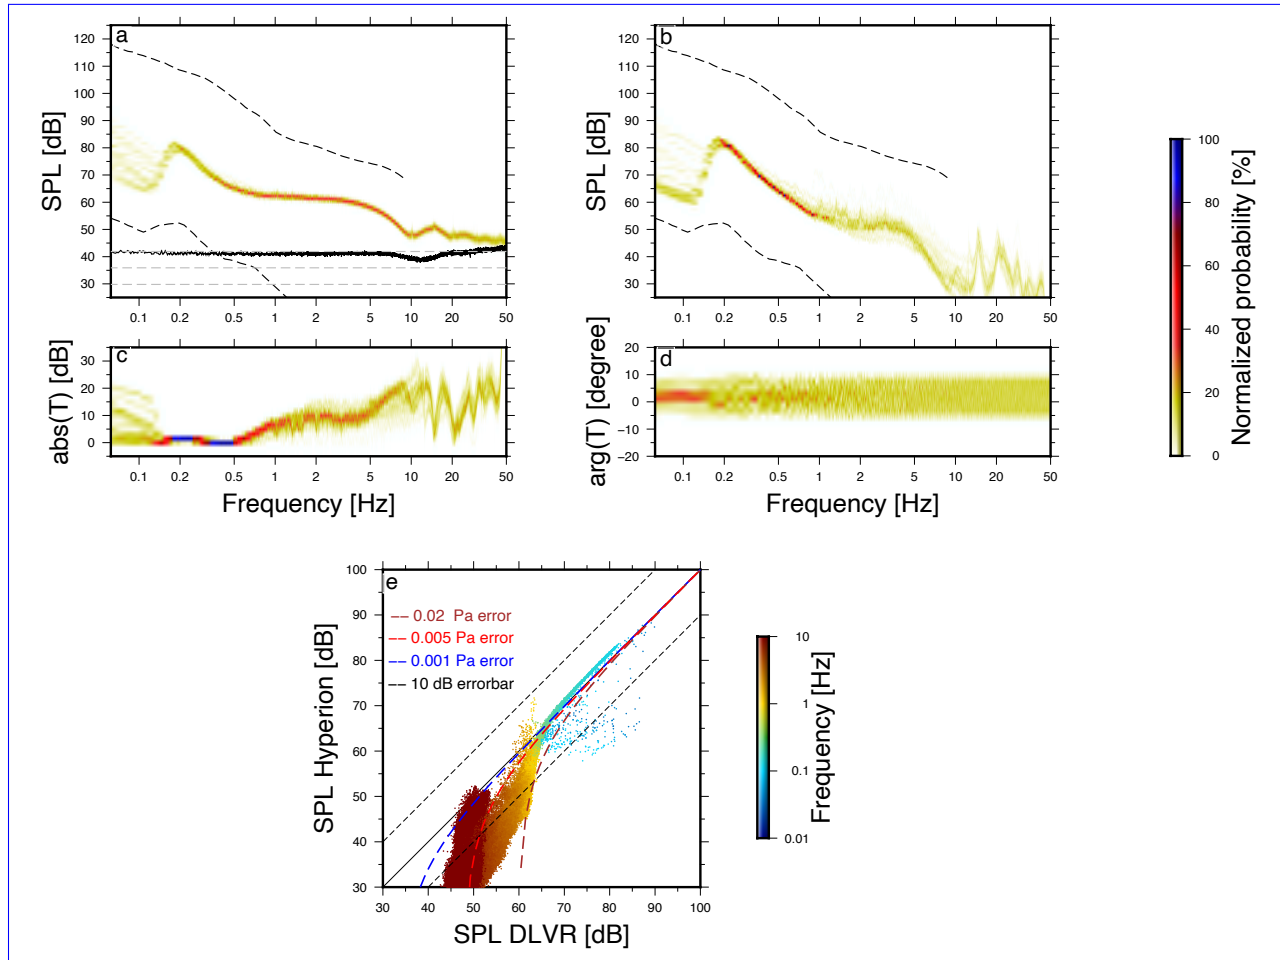

Figure 4: PDF's of pressure spectra recorded with the mini-MB (a) and the Hyperion sensor (b) for a week of continuous recording in dB re.  $20^{-6} \text{ Pa}^2/\text{Hz}$ . The dotted-dashed lines indicate the infrasonic high and low ambient noise levels [Brown et al., 2014]. Panel (a) shows as well the PSD of the 24hr self-noise recording of the mini-MB in black, and the theoretical self-noise for a 12-, 13-, and 14-bit ADC as the gray dashed lines. Panels (c) and (d) visualise the absolute difference T in amplitude and phase between the mini-MB and the Hyperion as a function of frequency. Panel (e) displays the differences in sound pressure level measured by the mini-MB and the Hyperion sensor for the various frequencies.

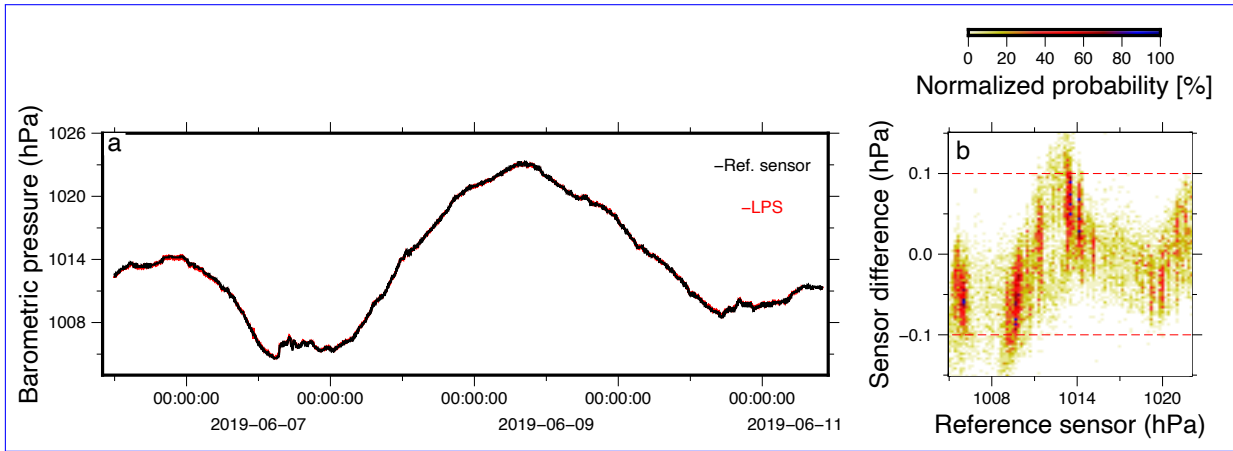

Figure 5: A comparison between the Barometric MEMS sensor (red) and a KNMI reference barometer (black). Panel (a) shows five days of barometric pressure recordings using both [sensors](#), while panel (b) displays the difference in measured barometric pressure by the MEMS and the reference sensor.



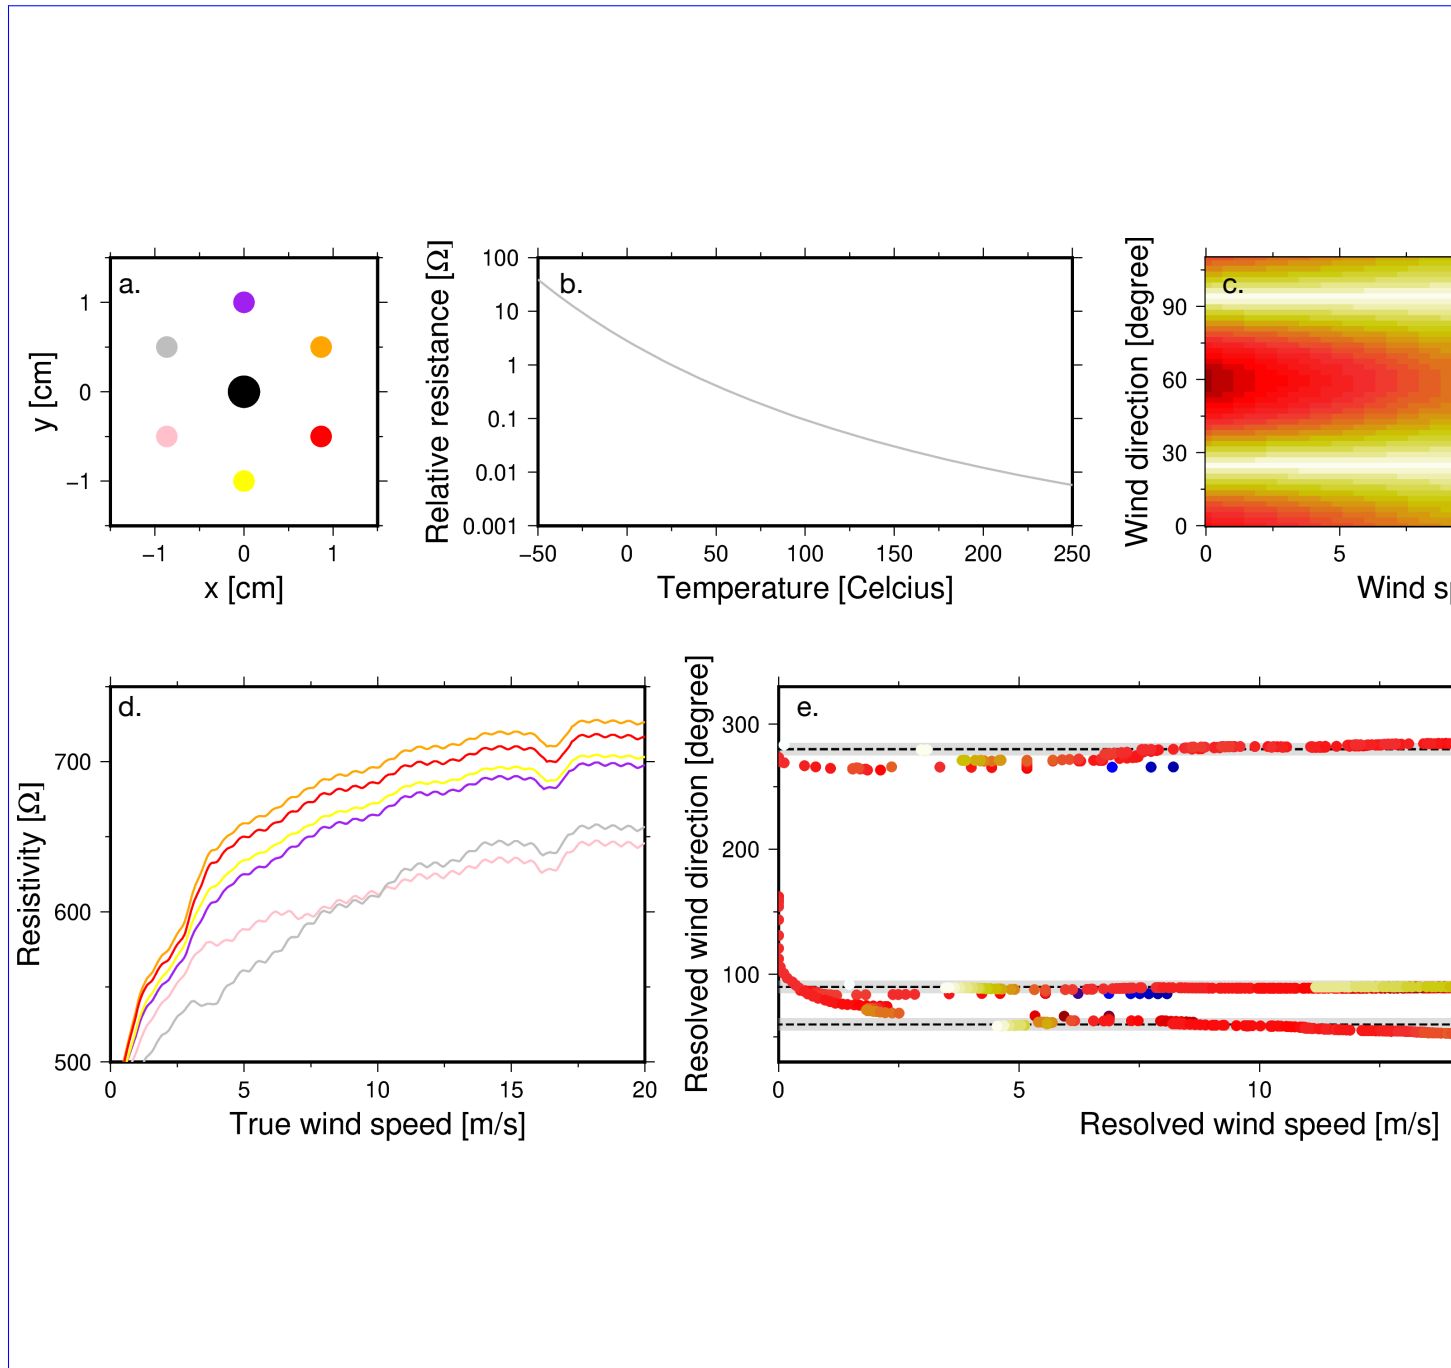

Figure 6: Analyses of the anemometer. Panel a shows the top view of the sensor design, with the central heating element. Panel b indicates the resistivity of the thermistors over temperature. The measured resistance of geometric sensitivity for the anemometer is shown in panel c. The thermistors' measured resistance for calibration set-up a2 (90°), the colors are in agreement with the sensor design (a), are shown in panel d. The solid black line is the average 4th order polynomial fit. Panel d-e indicates the resolved wind direction (solid lines) and wind speed compared with the expected-actual direction (dotted lines) and correct wind speed of set-ups a1 (270°), b2 (90°), and e3 (60°). The gray shaded area indicates the ±5° accuracy interval.

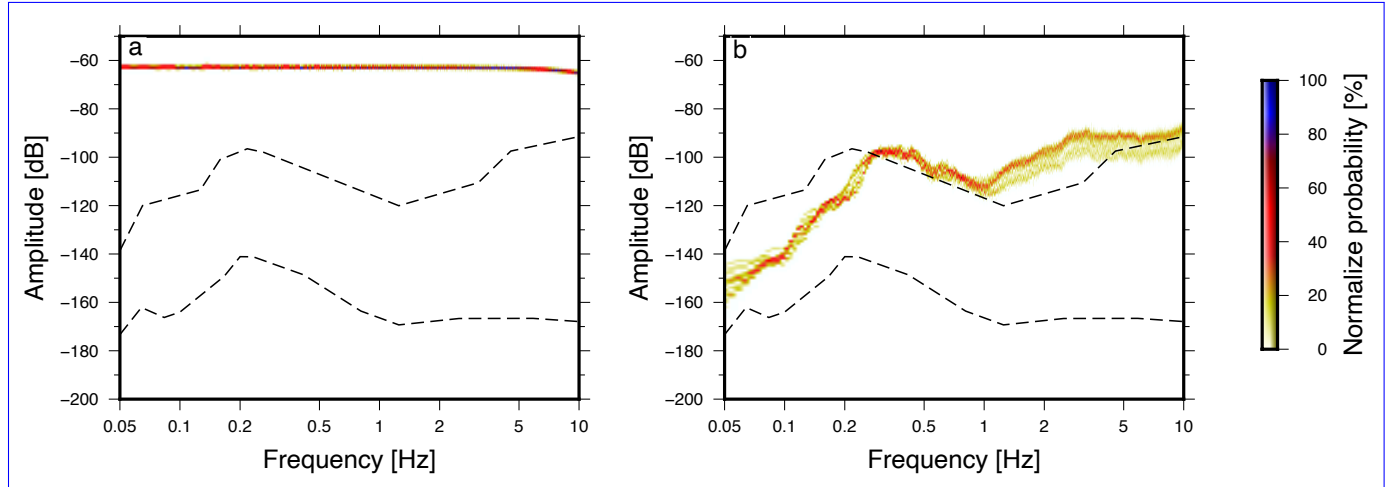

Figure 7: PDF's of the LSM IMU accelerometer (a) and the Streckeisen STS-2 connected to a Quanterra Q330 (b) for 24 hours of continuous recording in dB re.  $\text{m}^2\text{s}^{-4}\text{Hz}^{-1}$ . The dotted lines indicate the seismic high and low ambient noise levels [Peterson, 1993].
